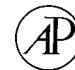

# New species of *Picea* A. Dietrich (Pinaceae) from the middle Eocene of Axel Heiberg Island, Arctic Canada

BEN A. LePAGE FLS

Department of Earth and Environmental Science, University of Pennsylvania, Philadelphia, PA 19104-6316, USA

Received January 2000; accepted for publication June 2000

The discovery of several hundred fertile and vegetative remains of three new species of *Picea* A. Dietrich (*P. sverdrupii*, *P. nansenii*, *P. palustris*) from the middle Eocene (45 Myr) sediments of the Buchanan Lake Formation on eastern Axel Heiberg Island, Canadian High Arctic provides a basis for re-assessment of the fossil record of the genus and evaluation of the morphological variability in this taxon. The identification and classification of extant *Picea* is based on a whole-tree concept that in turn is based on the importance of one or more of the following features: cross-sectional shape of the leaves; degree of pubescence of the twigs; arrangement of the stomata on the leaves; colour of the leaves and new growth shoots; length and shape of the cones; shape and degree of pubescence of the buds; and cone-scale morphology. However, the degree of intraspecific variability of these characters is poorly understood and has contributed a great deal towards our general inability to interpret reliably the evolutionary history and phylogenetic relationships within the genus. Examination of the bracts of the Axel Heiberg spruces and all extant species of *Picea* indicates that bract morphology is distinctive for each species and useful for species circumscription. These data allow the genus to be divided into two broad morphological groups that are in general agreement with topologies based on molecular data. © 2001 The Linnean Society of London

ADDITIONAL KEY WORDS: Buchanan Lake Formation – Coniferales – Eureka Sound Group – evolution – fossil – phylogeny – systematics.

## INTRODUCTION

The genus *Picea* A. Dietrich consists of 34 species of spruce that are restricted to the Northern Hemisphere (Farjon, 1990). The spruces are prominent constituents of the boreal, montane and sub-alpine forests of North America and Eurasia. The North American *P. glauca* (Moench) Voss and *P. mariana* (Miller) Britton, Sterns & Poggenberg, and the Eurasian *P. abies* (L.) Karsten and *P. obovata* Ledebour have extensive trans-continental distributions and typically form the northern limit of trees in North America, Europe and Asia. The remaining 30 species are restricted to the montane regions of North America, Europe and Asia. Although knowledge of some of the economically important species such as *P. glauca* and *P. engelmannii* Parry ex

Engelmann is considerable, little is known about character variability, ecological requirements and tolerances, and phylogenetic relationships of most species, especially the geographically restricted species growing in the montane regions of south-west China.

Features that help to distinguish *Picea* from other genera of the Pinaceae include well-developed pulvini on the shoots, a monomorphic branching system, equifacial and dorsiventrally-flattened leaves that are individually attached and helically arranged on shoots, pendulous cones and an evergreen habit. The spruces occur in a variety of ecological habitats, and as a group are adapted to a wide range of climate. In regions such as northern Canada, Alaska and Siberia, where climate is cold and the growing season is short, pure stands of *Picea* are common. Where temperatures are warmer and the growing season is longer, *Picea* commonly occurs mixed with deciduous and evergreen gymnosperms and angiosperms.

The fossil record of *Picea* includes reports of wood,

E-mail: [blepage@sas.upenn.edu](mailto:blepage@sas.upenn.edu)

**Table 1.** Fossil record of the genus *Picea* A. Dietrich

| Location            | Locality           | Type of fossils | Name                                    | Age              | Author                             |
|---------------------|--------------------|-----------------|-----------------------------------------|------------------|------------------------------------|
| North America       |                    |                 |                                         |                  |                                    |
| <i>Canada</i>       |                    |                 |                                         |                  |                                    |
| Axel Heiberg Island | Geodetic Hills 'a' | C               | <i>Picea heibergii</i> sp. nov.         | Eocene           | This report                        |
|                     |                    | C, V            | <i>Picea nansenii</i> sp. nov.          | Eocene           | This report                        |
|                     | Geodetic Hills 'b' | C               | <i>Picea palustris</i> sp. nov.         | Eocene           | This report                        |
|                     |                    | C               | <i>Picea banksii</i> Hills & Ogilvie    | Eocene           | Hills & Bustin, 1976; Bustin, 1982 |
| Banks Island        | Ballast Brook      | C, V            | <i>Picea banksii</i> Hills & Ogilvie    | Miocene          | Hills & Ogilvie, 1970              |
| British Columbia    | Vancouver Island   | C               | <i>Picea sookensis</i> LaMotte          | Oligocene        | LaMotte, 1935                      |
|                     | Quilchena          | V               | <i>Picea quilchenensis</i> Penhallow    | Eocene/Oligocene | Penhallow, 1906, 1908              |
|                     | Tranquille River   | V               | <i>Picea tranquillensis</i> Penhallow   | Eocene/Oligocene | Penhallow, 1908                    |
|                     | Kettle River       | C               | <i>Picea columbiensis</i> Penhallow     | Eocene/Oligocene | Penhallow, 1907, 1908              |
| <i>U.S.A.</i>       |                    |                 |                                         |                  |                                    |
| Montana             | Red Lodge          | P               | <i>Picea grandivescipites</i> Wodehouse | Paleocene        | Wilson & Webster, 1946             |
| Colorado            | Green River        | P               | <i>Picea grandivescipites</i> Wodehouse | Eocene           | Wodehouse, 1933                    |
| Alaska              | Kukak Bay          | V               | <i>Picea</i> sp.                        | Late Eocene      | Knowlton, 1904                     |
|                     | Kukak Bay          | C               | <i>Picea harrimanii</i> Knowlton        | Late Eocene      | Knowlton, 1904; Hollick, 1936      |
| Nevada              | Copper Basin       | V               | <i>Picea sonomensis</i> Axelrod         | Late Eocene      | Axelrod, 1966                      |
|                     | Copper Basin       | V               | <i>Picea</i> sp.                        | Late Eocene      | Axelrod, 1966                      |
|                     | Copper Basin       | V               | <i>Picea magna</i> MacGinitie           | Late Eocene      | Axelrod, 1966                      |
|                     | Copper Basin       | C, V            | <i>Picea lahontense</i> MacGinitie      | Late Eocene      | Axelrod, 1966                      |
| Montana             | Upper Ruby Basin   | V               | <i>Picea lahontense</i> MacGinitie      | Oligocene        | Becker, 1961                       |
|                     | Upper Ruby Basin   | V               | <i>Picea</i> sp.                        | Oligocene        | Becker, 1961                       |
|                     | Beaverhead Basin   | V               | <i>Picea lahontense</i> MacGinitie      | Oligocene        | Becker, 1969                       |
|                     | Beaverhead Basin   | V               | <i>Picea magna</i> MacGinitie           | Oligocene        | Becker, 1969                       |
|                     | Beaverhead Basin   | V               | <i>Picea sonomensis</i> Axelrod         | Oligocene        | Becker, 1969                       |
|                     | Beaverhead Basin   | V               | <i>Picea lahontense</i> MacGinitie      | Oligocene        | Becker, 1969                       |
| Colorado            | Avon               | C               | <i>Picea diettertiana</i> Miller        | Oligocene        | Miller, 1970                       |
|                     | Florissant         | V               | <i>Picea lahontense</i> MacGinitie      | Oligocene        | MacGinitie, 1953                   |
|                     | Florissant         | V               | <i>Picea magna</i> MacGinitie           | Oligocene        | MacGinitie, 1953                   |
|                     | Creede Caldera     | V               | <i>Picea</i> sp.                        | Oligocene        | Wolfe & Schorn, 1990               |
|                     | Creede Caldera     | C, V            | <i>Picea coloradensis</i> Axelrod       | Oligocene        | Axelrod, 1987                      |
|                     | Creede Caldera     | C, V            | <i>Picea lahontense</i> MacGinitie      | Oligocene        | Axelrod, 1987                      |
|                     | Creede Caldera     | V               | <i>Picea sonomensis</i> Axelrod         | Oligocene        | Axelrod, 1987                      |
| Idaho               | Thunder Mountain   | S               | <i>Picea magna</i> MacGinitie           | Eocene           | Axelrod, 1998                      |

continued

Table 1. *continued*

| Location        | Locality          | Type of fossils                       | Name                                     | Age                                | Author                                      |
|-----------------|-------------------|---------------------------------------|------------------------------------------|------------------------------------|---------------------------------------------|
| Washington      | Thunder Mountain  | C, S, V                               | <i>Picea coloradensis</i><br>Axelrod     | Eocene                             | Axelrod, 1998                               |
|                 | Thunder Mountain  | C                                     | <i>Picea deweyensis</i><br>Axelrod       | Eocene                             | Axelrod, 1998                               |
|                 | Trapper Creek     | V                                     | <i>Picea sonomensis</i><br>Axelrod       | Miocene                            | Axelrod, 1964                               |
|                 | Idaho City        | V                                     | <i>Picea</i> sp.                         | Miocene                            | Knowlton, 1898                              |
|                 | Tipton            | V                                     | <i>Pseudotsuga masonii</i><br>MacGinitie | Miocene                            | Smith, 1941                                 |
|                 | Thorn Creek       | V                                     | Unidentified seed                        | Miocene                            | Smith, 1941                                 |
|                 | Trapper Creek     | V                                     | <i>Picea magna</i> MacGinitie            | Miocene                            | Axelrod, 1964                               |
|                 | Republic          | S                                     | <i>Picea</i> spp.                        | Eocene                             | Wehr & Schorn, 1992                         |
|                 | Olympic Peninsula | C                                     | <i>Picea eichornii</i> Miller            | Oligocene                          | Miller, 1989                                |
|                 | Vantage           | W                                     | <i>Picea</i> sp.                         | Miocene                            | Beck, 1945a, 1945b                          |
|                 | Vantage           | W                                     | <i>Piceoxylon</i> sp.                    | Miocene                            | Beck, 1945a                                 |
|                 | Columbia Plateau  | V                                     | <i>Picea magna</i> MacGinitie            | Miocene                            | Chaney & Axelrod, 1959                      |
|                 | Columbia Plateau  | C, V                                  | <i>Picea lahontense</i><br>MacGinitie    | Miocene                            | MacGinitie, 1933;<br>Chaney & Axelrod, 1959 |
|                 | Oregon            | Columbia Plateau                      | V                                        | <i>Picea sonomensis</i><br>Axelrod | Miocene                                     |
|                 | Tipton            | V                                     | <i>Pseudotsuga masonii</i><br>MacGinitie | Miocene                            | Oliver, 1936                                |
| Nevada          | Tipton            | C                                     | <i>Picea</i> sp.                         | Miocene                            | Mason, 1927                                 |
|                 | Virgin Valley     | C                                     | <i>Picea wolfei</i> Crabtree             | Miocene                            | Crabtree, 1983                              |
|                 | Rainbow Ridge     | W                                     | <i>Piceoxylon</i> sp.                    | Miocene                            | Beck, 1945a                                 |
|                 | Fingerrock Wash   | V                                     | <i>Picea breweriana</i> S.<br>Watson     | Miocene                            | Wolfe, 1964                                 |
|                 | Fingerrock Wash   | C                                     | <i>Picea magna</i> MacGinitie            | Miocene                            | Wolfe, 1964                                 |
|                 | Middlegate Basin  | V                                     | <i>Picea lahontense</i><br>MacGinitie    | Miocene                            | Axelrod, 1985                               |
|                 | Middlegate Basin  | V                                     | <i>Picea sonomensis</i><br>Axelrod       | Miocene                            | Axelrod, 1985                               |
|                 | Buffalo Canyon    | C                                     | <i>Picea lahontense</i><br>MacGinitie    | Miocene                            | Axelrod, 1991                               |
|                 | Buffalo Canyon    | C                                     | <i>Picea magna</i> MacGinitie            | Miocene                            | Axelrod, 1991                               |
|                 | Buffalo Canyon    | C                                     | <i>Picea sonomensis</i><br>Axelrod       | Miocene                            | Axelrod, 1991                               |
| Mullen Pass     | C                 | <i>Picea sonomensis</i><br>Axelrod    | Miocene                                  | Axelrod, 1992                      |                                             |
| Purple Mountain | V                 | <i>Picea lahontense</i><br>MacGinitie | Miocene                                  | Axelrod, 1995                      |                                             |
| Purple Mountain | V                 | <i>Picea magna</i> MacGinitie         | Miocene                                  | Axelrod, 1995                      |                                             |
| Purple Mountain | V                 | <i>Picea sonomensis</i><br>Axelrod    | Miocene                                  | Axelrod, 1995                      |                                             |
| Nevada          | Aldrich Station   | C                                     | <i>Picea magna</i> MacGinitie            | Miocene/Pliocene                   | Axelrod, 1956                               |
|                 | Aldrich Station   | C                                     | <i>Picea sonomensis</i><br>Axelrod       | Miocene/Pliocene                   | Dorf, 1938; Smith, 1938                     |
| Idaho           | Hog Creek         | C                                     | <i>Picea lahontense</i><br>MacGinitie    | Pliocene                           | Axelrod, 1944b                              |

*continued*

Table 1. continued

| Location   | Locality                | Type of fossils                                                                          | Name                                                             | Age                      | Author                         |
|------------|-------------------------|------------------------------------------------------------------------------------------|------------------------------------------------------------------|--------------------------|--------------------------------|
| California | Neer's Hill             | C                                                                                        | <i>Picea sonomensis</i><br>Axelrod                               | Pliocene                 | Axelrod, 1944b                 |
| Oregon     | Alvord Creek            | C                                                                                        | <i>Picea lahontense</i><br>MacGinitie                            | Pliocene                 | Axelrod, 1944a                 |
|            | Alvord Creek            | C                                                                                        | <i>Picea sonomensis</i><br>Axelrod                               | Pliocene                 | Axelrod, 1944a                 |
| Greenland  | Tipton                  | C, V                                                                                     | <i>Picea</i> sp.                                                 | Pliocene                 | Brown, 1937                    |
|            | Tipton                  | C                                                                                        | <i>Picea</i> sp.                                                 | Pliocene                 | Brown, 1937                    |
|            | Kap København           | C, V                                                                                     | <i>Picea mariana</i> (Miller)<br>Britton, Sterns &<br>Poggenberg | Pliocene/<br>Pleistocene | Bennike, 1990                  |
| Asia       |                         |                                                                                          |                                                                  |                          |                                |
| Russia     | Kamchatka               | C                                                                                        | <i>Picea snatolensis</i><br>Chelebaeva                           | Late Eocene              | Gladenkov <i>et al.</i> , 1991 |
|            | Kamchatka               | C                                                                                        | <i>Picea fimbriata</i><br>Chelebaeva                             | Late Eocene              | Gladenkov <i>et al.</i> , 1991 |
|            | Kamchatka               | V                                                                                        | <i>Picea magna</i> MacGinitie                                    | Late Eocene              | Gladenkov <i>et al.</i> , 1991 |
|            | Novy Log                | V                                                                                        | <i>Picea</i> sp.                                                 | Oligocene                | Dorofeev, 1970                 |
|            | Yuzhnogo<br>Mountain    | V                                                                                        | <i>Picea</i> sp. 1                                               | Oligocene                | Rayushkina, 1979               |
|            | Yuzhnogo<br>Mountain    | V                                                                                        | <i>Picea</i> sp. 2                                               | Oligocene                | Rayushkina, 1979               |
|            | Yuzhnogo<br>Mountain    | V                                                                                        | <i>Picea altaica</i><br>Rayushkina                               | Oligocene                | Rayushkina, 1979               |
|            | Mugodzhar               | C                                                                                        | <i>Picea mugodzharica</i><br>Rayushkina                          | Oligocene                | Rayushkina, 1979               |
|            | Ob and Irmish<br>rivers | V                                                                                        | <i>Picea</i> sp. 1                                               | Oligocene/Miocene        | Dorofeev, 1963                 |
|            | Ob and Irmish<br>rivers | V                                                                                        | <i>Picea</i> sp. 2                                               | Oligocene/Miocene        | Dorofeev, 1963                 |
|            | Sakhalin                | V                                                                                        | <i>Picea kanehari</i> Tanai &<br>Onoé                            | Oligocene/Miocene        | Fotyanova, 1988                |
|            | Botchi River            | V                                                                                        | <i>Picea</i> sp. 1                                               | Miocene                  | Akhmetiev, 1973                |
|            | Botchi River            | V                                                                                        | <i>Picea</i> sp. 2                                               | Miocene                  | Akhmetiev, 1973                |
|            | Botchi River            | C                                                                                        | <i>Picea</i> sp. 3                                               | Miocene                  | Akhmetiev, 1973                |
|            | Botchi River            | V                                                                                        | <i>Picea</i> sp. 4                                               | Miocene                  | Akhmetiev, 1973                |
|            | Botchi River            | V                                                                                        | <i>Picea</i> sp. 5                                               | Miocene                  | Akhmetiev, 1973                |
|            | Aldan River             | V                                                                                        | <i>Picea</i> sp.                                                 | Miocene                  | Dorofeev, 1969                 |
|            | Tambov                  | V                                                                                        | <i>Picea</i> sp.                                                 | Miocene                  | Dorofeev, 1988                 |
|            | Omoloi River            | C                                                                                        | <i>Picea wollowsowiczii</i><br>Sukaczev                          | Miocene                  | Dorofeev, 1972                 |
|            | Omoloi River            | V                                                                                        | <i>Picea</i> sp.                                                 | Miocene                  | Dorofeev, 1972                 |
| Kamchatka  | V                       | <i>Picea jezoensis</i> (Siebold<br>& Zuccarini) Carrière<br>var. <i>fossilis</i> Palibin | Pliocene                                                         | Palibin, 1934            |                                |
| Japan      | Honshu                  | S                                                                                        | <i>Picea</i> sp.                                                 | Eocene                   | Huzioka & Takahasi,<br>1970    |
|            | Honshu                  | V                                                                                        | <i>Picea</i> sp.                                                 | Oligocene/Miocene        | Tanai, 1952                    |
|            | Honshu                  | V                                                                                        | <i>Picea kanehari</i> Tanai &<br>Onoé                            | Miocene                  | Tanai and Onoé, 1961           |

continued

Table 1. continued

| Location    | Locality         | Type of fossils | Name                                                                      | Age            | Author                                        |
|-------------|------------------|-----------------|---------------------------------------------------------------------------|----------------|-----------------------------------------------|
|             | Hokkaido         | V               | <i>Picea kanehari</i> Tanai & Onoé                                        | Miocene        | Tanai, 1961; Tanai & Suzuki, 1963, 1965, 1972 |
|             | Hokkaido, Honshu | V               | <i>Picea kanoi</i> Huzioka                                                | Miocene        | Tanai, 1961; Tanai & Suzuki, 1963, 1965, 1972 |
|             | Hokkaido         | V               | <i>Picea ugoana</i> Huzioka                                               | Miocene        | Tanai, 1961; Tanai & Suzuki, 1963, 1965, 1972 |
|             | Honshu           | V               | <i>Picea sugaii</i> Tanai & Onoé                                          | Miocene        | Tanai, 1955, 1961; Tanai & Onoé, 1959         |
|             | Honshu           | V               | <i>Picea miocenica</i> Tanai                                              | Miocene        | Tanai, 1961                                   |
|             | Honshu           | S               | <i>Picea kanehari</i> Tanai & Onoé                                        | Miocene        | Huzioka, 1963                                 |
|             | Honshu           | S               | <i>Picea magna</i> MacGinitie                                             | Miocene        | Huzioka, 1963                                 |
|             | Honshu           | S               | <i>Picea kanehari</i> Tanai & Onoé                                        | Miocene        | Matsuo, 1963                                  |
|             | Honshu           | S               | <i>Picea kanehari</i> Tanai & Onoé                                        | Miocene        | Ishida, 1970                                  |
|             | Honshu           | V               | <i>Picea</i> sp.                                                          | Miocene        | Ozaki, 1991                                   |
|             | Hokkaido         | C               | <i>Picea garoensis</i> Tanai & Suzuki                                     | Miocene        | Tanai & Suzuki, 1972                          |
|             | Hokkaido         | V               | <i>Picea hiyomensis</i> Tanai & Suzuki                                    | Miocene        | Tanai & Suzuki, 1963                          |
|             | Hokkaido         | V               | <i>Picea magna</i> MacGinitie                                             | Miocene        | Tanai, 1961; Tanai & Suzuki, 1963             |
|             | Honshu           | C               | <i>Picea cf. maximowiczii</i> Regel ex Masters                            | Pliocene       | Miki, 1941                                    |
|             | Honshu           | C, V            | <i>Picea koribai</i> Miki                                                 | Pliocene       | Miki, 1948, 1957                              |
|             | Honshu           | V               | <i>Picea polita</i> (Siebold & Zuccarini) Carrière                        | Pliocene       | Yabe & Endô, 1939                             |
|             | Honshu           | C, V, S         | <i>Picea polita</i> (Siebold & Zuccarini) Carrière                        | Pleistocene    | Onoé, 1989                                    |
| Europe      |                  |                 |                                                                           |                |                                               |
| Belgium     | Quenast          | P               | <i>Piceapollenites</i> sp.                                                | Eocene         | Pastiels, 1948                                |
| Netherlands | Reuver           | W               | <i>Picea</i> sp.                                                          | Pliocene       | Slijper, 1932                                 |
|             | Reuver           | C               | <i>Picea excelsa</i> (Lamark) Link                                        | Pliocene       | Reid & Reid, 1915                             |
| Germany     | Lausitz          | C, V            | <i>Picea beckii</i> Mai                                                   | Late Oligocene | Mai, 1987; Mai & Walther, 1991                |
|             | Frankfurt        | W               | <i>Piceoxylon</i> sp.                                                     | Pliocene       | Mädler, 1939                                  |
|             | Frankfurt        | C               | <i>Picea</i> sp.                                                          | Pliocene       | Mädler, 1939                                  |
|             | Frankfurt        | C               | <i>Picea aff. rubra</i> (DuRoi) Link var. <i>fossilis</i> Kinkelin        | Pliocene       | Engelhardt & Kinkelin, 1908                   |
|             | Frankfurt        | C               | <i>Picea excelsa</i> (Lamark) Link var. <i>fossilis</i> Geyler & Kinkelin | Pliocene       | Engelhardt & Kinkelin, 1908                   |
|             | Frankfurt        | V               | <i>Picea excelsa</i> (Lamark) Link var. <i>fossilis</i> Geyler & Kinkelin | Pliocene       | Mädler, 1939                                  |

continued

Table 1. continued

| Location       | Locality   | Type of fossils | Name                                                                                 | Age      | Author                                        |
|----------------|------------|-----------------|--------------------------------------------------------------------------------------|----------|-----------------------------------------------|
|                | Frankfurt  | C, V            | <i>Picea latisquamosa</i><br>Ludwig                                                  | Pliocene | Engelhardt &<br>Kinkel, 1908;<br>Mädler, 1939 |
|                | Frankfurt  | C               | <i>Picea latisquamosa</i><br>Ludwig var. <i>fusiformis</i><br>Kinkel                 | Pliocene | Engelhardt &<br>Kinkel, 1908                  |
|                | Frankfurt  | C               | <i>Picea latisquamosa</i><br>Ludwig var. <i>cylindrica</i><br>Kinkel                 | Pliocene | Engelhardt &<br>Kinkel, 1908                  |
|                | Frankfurt  | C               | <i>Abies pectinata</i><br>DeCandolle var. <i>fossilis</i><br>Geyler & Kinkel         | Pliocene | Engelhardt &<br>Kinkel, 1908                  |
|                | Flörsheim  | C               | <i>Picea latisquamosa</i><br>Ludwig                                                  | Pliocene | Engelhardt, 1911                              |
|                | Flörsheim  | C               | <i>Picea oligocaenica</i><br>Engelhardt                                              | Pliocene | Engelhardt, 1911                              |
| Poland         | Czorsztyna | C               | <i>Picea excelsa</i> (Lamarck)<br>Link var. <i>fossilis</i> Geyler<br>& Kinkel       | Pliocene | Szafer, 1954                                  |
|                | Czorsztyna | C               | <i>Picea polita</i> (Siebold &<br>Zuccarini) Carrière var.<br><i>fossilis</i> Szafer | Pliocene | Szafer, 1954                                  |
|                | Krościenka | C               | <i>Picea excelsa</i> (Lamarck)<br>Link var. <i>fossilis</i> Geyler<br>& Kinkel       | Pliocene | Szafer, 1947                                  |
|                | Krościenka | C, V            | <i>Picea polita</i> (Siebold &<br>Zuccarini) Carrière var.<br><i>fossilis</i> Szafer | Pliocene | Szafer, 1947                                  |
|                | Krościenka | C, V            | <i>Picea rubra</i> (DuRoi)<br>Link                                                   | Pliocene | Szafer, 1947                                  |
|                | Krościenka | C, V            | <i>Picea cf. glehnii</i> (Fr.<br>Schmidt) Masters                                    | Pliocene | Szafer, 1947                                  |
| Czechoslovakia | Cheb       | V               | <i>Picea omorikoides</i> Weber                                                       | Pliocene | Bůžek, Kvaček & Holý,<br>1985                 |
| Romania        | Chiuzbaia  | S               | <i>Picea</i> sp.                                                                     | Miocene  | Givulescu, 1990                               |
|                | Chiuzbaia  | S               | <i>Picea</i> sp. aff. <i>P. magna</i><br>MacGinitie                                  | Miocene  | Givulescu, 1979                               |

C = cones and cone scales; S = seeds; V = leaves and twigs; W = wood; and P = pollen.

seeds, leaves and cones, and indicates that the genus was present in North America and Eurasia during the mid- to late Tertiary (Table 1). Although *Picea* is reasonably well represented in the fossil record, the ambiguous taxonomic status and putative relationships between many of the living species, especially those from south-west China, and the ability of most living species to hybridize have made understanding of living and fossil *Picea* taxonomy and phylogeny difficult to interpret.

Exquisitely preserved fertile and vegetative *Picea* remains recovered from the Buchanan Lake Formation, Eureka Sound Group on Axel Heiberg Island

extend the record of this group to the middle Eocene (c. 45 Myr). Recognition of three new fossil *Picea* species from the Axel Heiberg Fossil Forests is based on detailed examination of fossil and living representatives. The principal characters used to identify and separate the Axel Heiberg Island spruces into three distinct species are the morphology of the seed cones and bract/scale complexes and facies association. The quality of preservation and large number of *Picea* fossils from this site also permitted assessment of such characters as the seed cones, seeds and leaves and their subsequent utility for taxonomic and systematic interpretation. The results of this examination con-

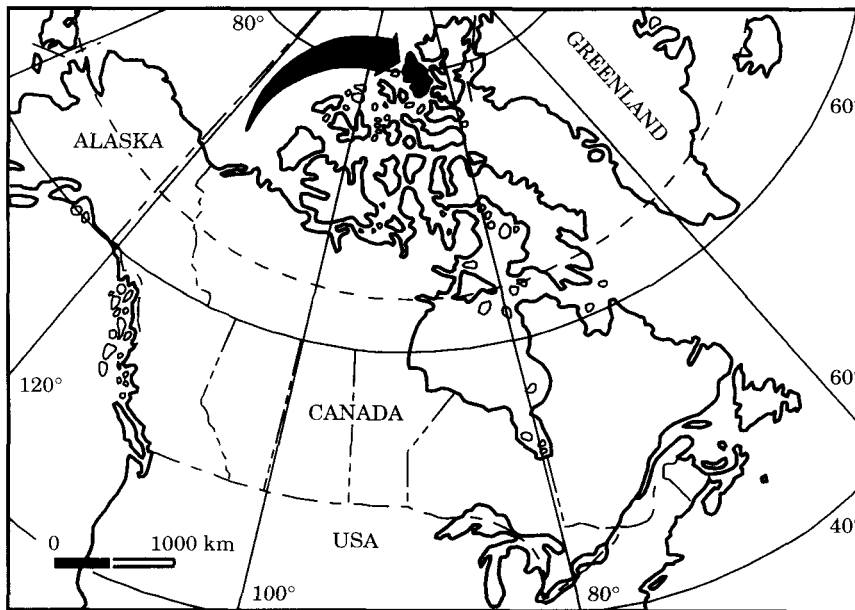

Figure 1. Map of Canada showing the location of Axel Heiberg Island (arrow) in the Canadian High Arctic.

tribute to clarifying the taxonomy and phylogeny of the genus.

## MATERIALS

### AXEL HEIBERG ISLAND LOCALITY

The fossils were recovered from sediments of the Buchanan Lake Formation, Eureka Sound Group, on Axel Heiberg Island, Canadian Arctic Archipelago (Figs 1, 2; 79°55'N, 89°02'W; Geological Survey of Canada, Map 1301A, Strand Fiord, District of Franklin, 1:250 000). The Buchanan Lake Formation, as described by Ricketts (1986, 1991, 1994), consists of four lithologically distinct and mappable members. The fossils occur in Ricketts's Upper Coal Member, which consists of interbedded sandstone, siltstone and lignite arranged in fining upward sequences.

Based on vertebrate remains, structural, petrographic, stratigraphic and palynological features, the age of these fossiliferous sediments has been determined to be middle Eocene (Ricketts, 1986, 1987, 1994; Ricketts & McIntyre, 1986; McIntyre, 1991; Eberle & Storer, 1999).

The plant fossils occur in two distinct facies associations. Abrasion-resistant allochthonous plant fossils are concentrated in a number of point-bar deposits in the upper part of the formation. More than 500 *Picea* seed cones were recovered from these sands together with unidentifiable woody fragments and rare seed cones of *Larix altoborealis* LePage & Basinger, *Pinus* L. and *Metasequoia* Miki ex Hu & Cheng, and

fruits of *Juglans* L. (Basinger, 1991; LePage & Basinger, 1991).

The autochthonous leaf-litter mats occur in the coaly facies in the lower part of the formation and represent the ancient forest floors of poorly-drained meanderplain swamps (Ricketts, 1986, 1991; Basinger, 1991). Plant megafossils recovered from a number of these forest-floor litter mats include the remains of the dominant conifers *Metasequoia* and *Glyptostrobus* Endlicher, and minor occurrences of *Picea*, *Pseudolarix amabilis* (Rehder) Gordon, *Pseudolarix wehrlii* Gooch, *Pinus*, *Larix altoborealis*, *Betula* L., *Alnus* Miller, *Carya* Nuttall, *Chamaecyparis* Spach, *Tsuga* (Endlicher) Carrière and *Osmunda* L., as well as a number of unidentified angiosperms and pteridophytes (Ricketts & McIntyre, 1986; Basinger, 1991; LePage & Basinger, 1991, 1995; McIntyre, 1991). The scarcity of *Picea* relative to other taxa in these litters indicates that *Picea* was an uncommon constituent within the Taxodiaceae-dominated swamp-forest communities.

Herbarium, living and fossil specimens of *Picea* used for comparison in this study are listed in Appendices 1 and 2.

## METHODS

Mummified *Picea* specimens were demineralized in cold 5% HCl for 24 h to remove all carbonates, rinsed with distilled water and immersed in 48% HF for 3–5 days. The HF was changed at least twice to ensure removal of all silicates. Specimens were then rinsed

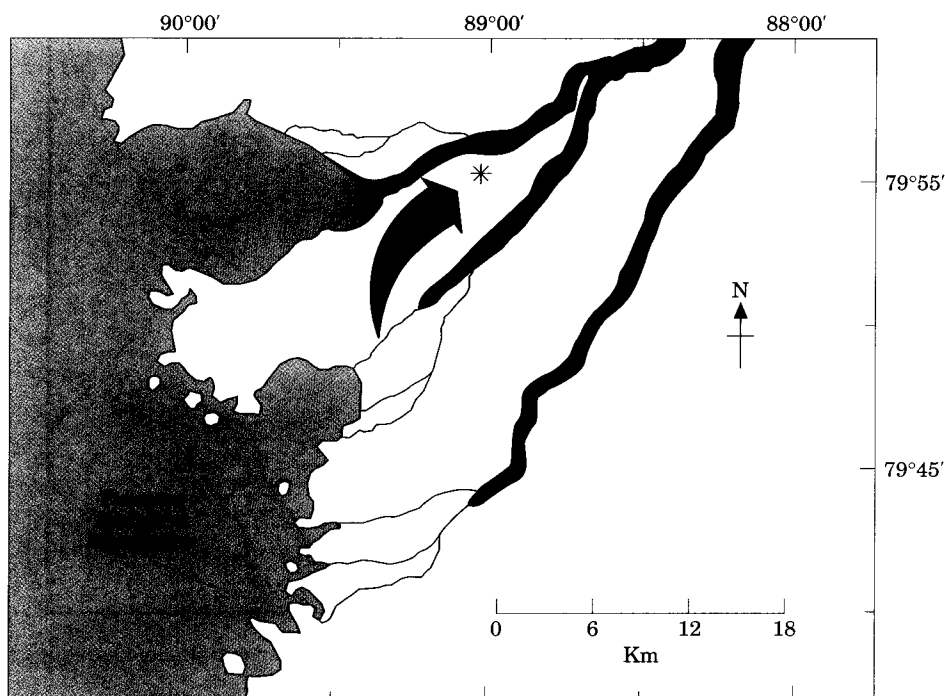

**Figure 2.** Geodetic Hills area, eastern Axel Heiberg Island, showing location (\*) of the Axel Heiberg Fossil Forests (79°55'N, 89°02'W).

with distilled water. Any sediment still adhering to the specimens was removed with a soft-haired artist's brush; more robust specimens were cleaned in an ultrasonic bath for 2–3 min.

Preparation of leaf cuticle was carried out according to the technique of Dilcher (1974), with the following modifications. Leaves that had not been exposed to acids were soaked in Calgon-softened water (30 mL of Calgon to 4.5 L water) for 48 h (J. Skog, pers. comm.). The demineralization process destroys the cuticle of leaves, especially when thin; the cuticle of the Axel Heiberg *Picea* leaves is surprisingly thin, approximately 4  $\mu\text{m}$ , relative to extant *Picea* leaves which are about 10  $\mu\text{m}$ . The leaves were oxidized in full-strength household bleach (6% NaOCl) for 30–60 s. When cleared, cuticular sheaths were rinsed in softened water, opened by micromanipulation, and mounted on stubs with double-sided tape, coated with gold and viewed on a Philips 505 scanning electron microscope at 30 kV.

Leaves of living *Picea* were oxidized in full-strength

bleach for 2–4 h; when clear, they were rinsed with distilled water and then mounted for SEM following the same procedure used for the fossils.

For photography, the surface features of some fossil and living specimens were enhanced by whitening with ammonium chloride ( $\text{NH}_4\text{Cl}$ ; Bassler, 1953).

Description of *Picea* morphology follows terminology proposed by Hickey (1973, 1977), Dilcher (1974) and Metcalf & Chalk (1979).

#### SYSTEMATIC PALAEOBOTANY

ORDER CONIFERALES

FAMILY PINACEAE LINDLEY

Genus *Picea* A. Dietrich

***Picea sverdrupii* LePage sp. nov.**

(Figs 3, 4, 84, 85)

#### *Specific diagnosis*

CONE ovoid to oblong-cylindrical, up to 115 mm long and 28 mm wide. CONE SCALE narrow to wide obovate,

**Figures 3–7.** New species of *Picea*. Fig. 3. ***Picea sverdrupii* sp. nov.** Cones showing variation in size. (A) US237-5613, (B) US237-5614, (C) US237-5615, (D) US237-5616, (E) US237-5617, (F) US237-5618, (G) US237-5619, (H) US237-5620 and (I) US237-5621. Scale bar = 10 mm. Fig. 4. ***Picea sverdrupii* sp. nov.** SEM of a winged seed. Note its similarity to the *P. brachytyla* seed shown in Figure 19d. US-SEM 153 (US186-5598). Scale bar = 1.0 mm. Fig. 5. ***Picea nansenii* sp. nov.** Cones showing their range in size. Note how the cones taper basally and apically. (A) US-184-5608,



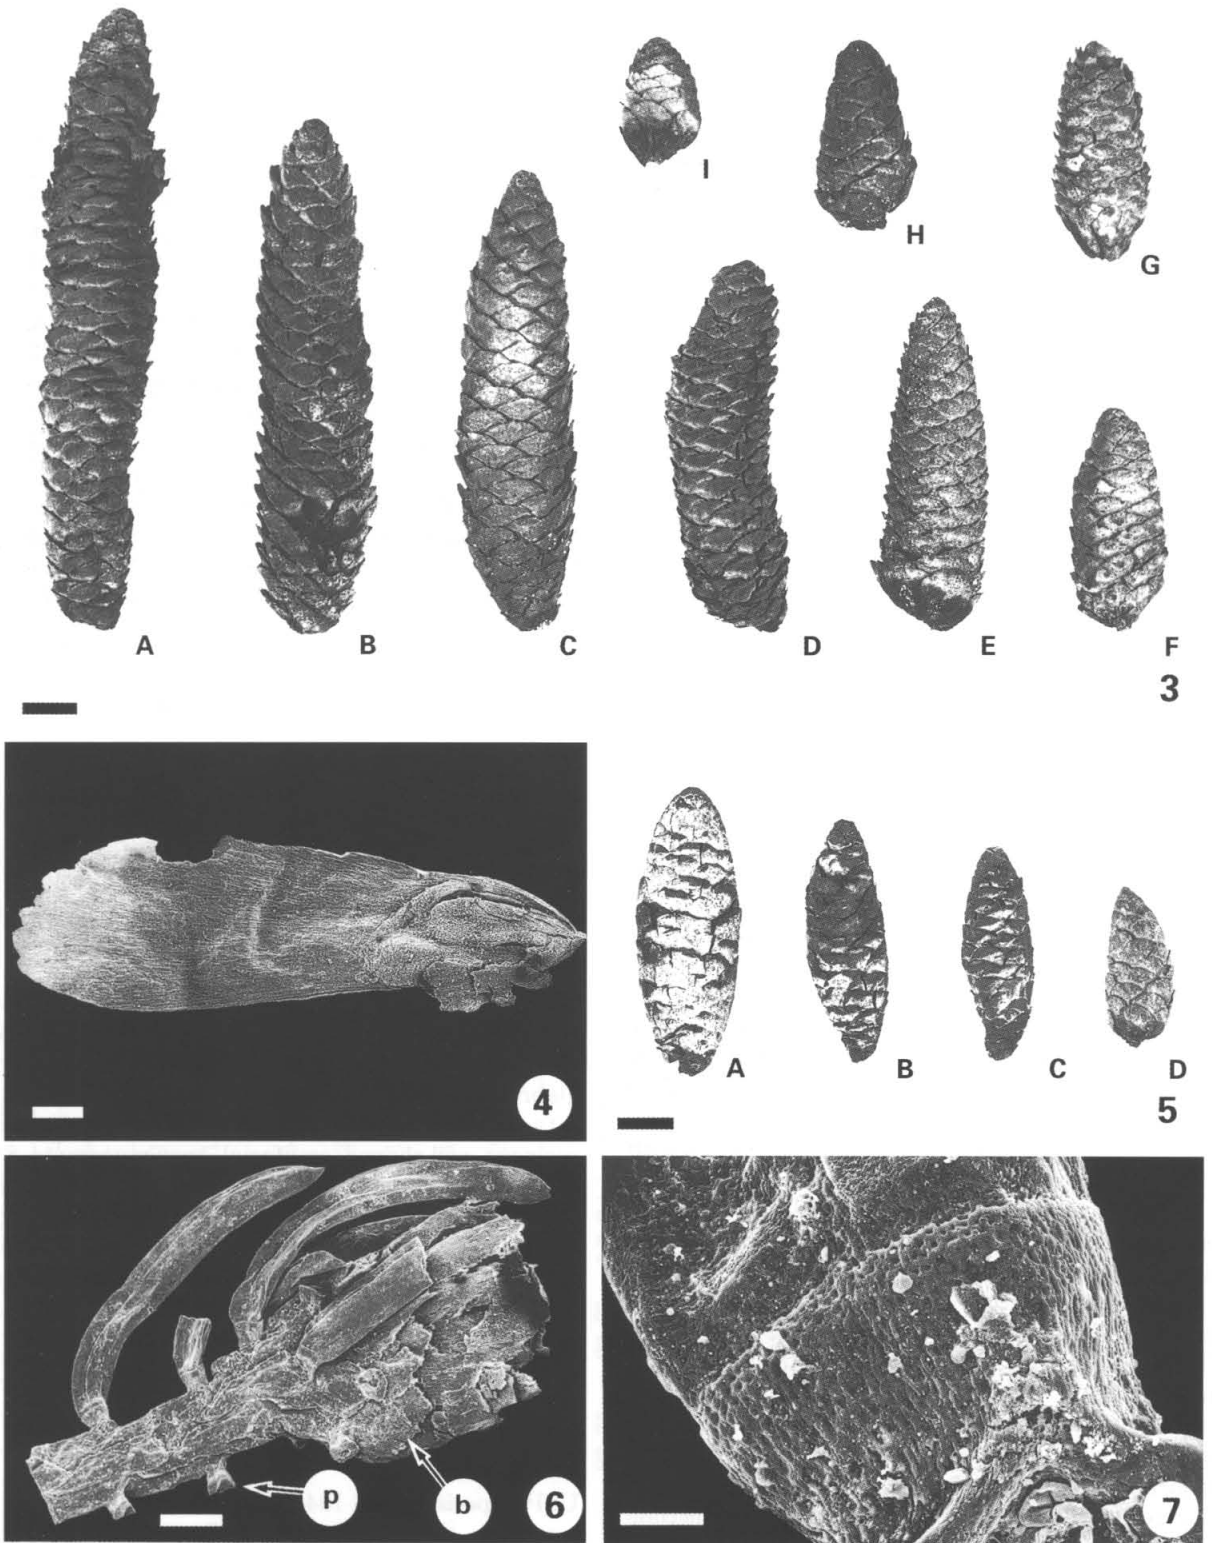

(B) US184-5609, (C) US520-5610 and (D) US220-5611. Scale bar = 10 mm. Fig. 6. *Picea nansonii* sp. nov. SEM of twig showing leaves attached to pulvini (p) and the terminal bud which is protected by bud scales (b) and sub-terminal leaves. US-SEM 138 (US220-5593). Scale bar = 1.0 mm. Fig. 7. *Picea nansonii* sp. nov. SEM close-up of a pulvinus and the attached leaf. US-SEM 138 (US220-5593). Scale bar = 1.0 mm.

up to 17 mm long and 12 mm wide; margin entire; apex rounded; abaxial surface smooth and glabrous. BRACT lanceolate, hidden, up to 8 mm long and 2 mm wide; basally adnate to the cone scale, free medially and apically; apex cuspidate to attenuate, rarely emarginate; margin entire to slightly wavy; glabrous. SEEDS two per scale, winged, up to 9 mm long and 3 mm wide; wing membranous, symmetrical, narrow obovate to oblanceolate, apex rounded; seed-body wide to narrow ovate, up to 3.5 mm long and 2 mm wide.

#### *Holotype*

University of Saskatchewan Paleobotanical Collection (USPC), Specimen US 237-5613.

#### *Paratypes*

USPC specimens US 186-5598, US 237-5588, US 237-5614-5621.

#### *Collecting localities*

US 114, 115, 119, 182, 186, 234, 235, 237, 520, 563, 567, 568, 585, 586, 587.

#### *Etymology*

In honour of Otto Sverdrup, Captain of the *Fram* 1893–96.

#### *Detailed description*

Seed cones of *P. sverdrupii* vary considerably in size (Fig. 3). The cones comprise 50–250+ imbricate, woody cone scales that are helically arranged around a central cone axis and attached by a short pedicel. Well-preserved specimens possess round cone-scale apices with entire margins and smooth adaxial surfaces (Fig. 84). However, most specimens show some degree of abrasion so that the cone scales have the appearance of being slightly toothed. Moreover, the abaxial surface of the scales are pitted by sand grains due to post-burial compression.

The bract is thin and lanceolate and up to 8 mm long and 2 mm wide. Each bract possesses a small apical tooth which is an extension of the vascular trace and gives the bract a cuspidate to attenuate appearance (Fig. 85).

Winged seeds of *P. sverdrupii* were found in the cone scales of some cones (Fig. 4). The seed-wing margins are entire, and the size and shape of the seeds are typical for the genus (Table 2; Figs 4, 19). Among the living species, the seeds of *P. brachytyla* (Franchet) Pritzell compare favorably to those of *P. sverdrupii* (Fig. 19d).

#### *Remarks*

More than 500 seed cones of *P. sverdrupii* were recovered from a number of channel and point-bar deposits that dissected the floodplains and lowland swamps. The establishment of this species is based, in part, on the morphology of the cones and bract-scale complexes and the habitat from which this species is thought to have occupied. Its appearance in predominantly fluvial deposits indicates that *P. sverdrupii* occupied the extrabasinal montane and riparian forest communities growing on the better-drained soils of the rising Princess Margaret Mountains, foothills and possibly in the floodplains on the levees of the streams and rivers that drained the montane watersheds. The small number of *P. sverdrupii* cones found in the autochthonous leafy litter mats indicates that these extrabasinal montane habitats were in close proximity to the swamps. Given the limited abrasion seen on the seed cones, transport was minimal and probably limited to a few kilometres (Spicer & Greer, 1986).

#### *Picea nansenii* LePage sp. nov.

(Figs 5–11, 86, 87)

#### *Specific diagnosis*

CONE ovoid to oblong-cylindrical, up to 57 mm long and 20 mm wide; composed of 40–100 imbricate, woody cone scales. CONE SCALE round to narrow or wide obovate, up to 13 mm long and 9.5 mm wide; margin entire; apex rounded; abaxial surface smooth and glabrous. BRACT subtending cone scale lanceolate, non-exserted, up to 2.5 mm long and 2 mm wide, resinous; basally adnate to the cone scale, but free medially and apically; apex cuspidate or emarginate; margin entire to crenate; glabrous. LEAVES helically arranged on shoots, basally attached to pulvini, up to 6.5 mm long and 1 mm wide; resinous, awl shaped, equifacial, apex mucronate. Stomata amphistomatic, inconspicuous and sunken. TERMINAL BUD round to ovoid in shape, covered by terminal scales and subterminal leaves. SEEDS two per scale, winged, up to 7 mm long and 3.5 mm wide; wing membranous, symmetrical, narrow obovate to oblanceolate, apex rounded; seed-body wide to narrow ovate, up to 2 mm long and 1.5 mm wide.

#### *Holotype*

USPC specimen US 184-5608.

#### *Paratypes*

USPC specimens US 184-5573, US 184-5594, US 184-5609, US 220-5572, US 220-5593, US 220-5611, US 520-5610.

Table 2. Comparison of extant members of *Picea* A. Dietrich with fossil representatives of *Picea*.

|                                                       | Cone length <sup>1</sup> | Cone width | L/W ratio | Scale length | Scale width | L/W ratio | Bract length | Bract width | L/W ratio | Leaf length | Leaf width | Seed body length | Seed body width | Wing length | Wing width |
|-------------------------------------------------------|--------------------------|------------|-----------|--------------|-------------|-----------|--------------|-------------|-----------|-------------|------------|------------------|-----------------|-------------|------------|
| <i>Picea abies</i> (L.) Karsten                       | 25–200                   | 15–50      | 1.7–4.0:1 | 15–30        | 10–20       | 1.5:1     | 2–7          | 1.5–2       | 1.5–3.5:1 | 8–30        | 0.8–2      | 2–5              | 1–2             | 6–26        | 4–6        |
| <i>Picea alcoquiana</i> (Veitch ex Lindley) Carrière  | 50–120                   | 30–55      | 1.7–2.2:1 | 15–25        | 8–21        | 1.2–1.9:1 | 2–3.5        | 1.5–2       | 1.4–1.6:1 | 8–20        | 0.7–1.5    | 2–5              | 1.5–3           | 11–18       | 6–7.5      |
| <i>Picea asperata</i> Masters                         | 50–160                   | 20–45      | 2.5–3.6:1 | 12–24        | 8–18        | 1.3–1.5:1 | 2–7          | 1.5–3       | 1.5–2.3:1 | 10–25       | 1–2        | 2–4              | 1.5–3           | 8–17        | 5–7        |
| <i>Picea aurantiaca</i> Masters                       | 95–120                   | 40–45      | 2.4–2.7:1 | 20–24        | 15–18       | 1.3:1     | 2–5          | 1.5–2       | 1.3–2.5:1 | 8–20        | 1–2.5      | 3–4              | 2–2.5           | 12–15       | 5–6        |
| <i>Picea brachylyta</i> (Franchet) Pritzel            | 40–120                   | 20–40      | 2.0–3.0:1 | 12–20        | 9–17        | 1.2–1.3:1 | 1.5–4.5      | 1.5–2       | 1.1–2.3:1 | 8–25        | 1–2        | 2–3              | 1–2             | 8–18        | 3–8        |
| <i>Picea breweriana</i> S. Watson                     | 60–140                   | 20–40      | 3.0–3.5:1 | 15–22        | 13–18       | 1.2:1     | 3–6          | 2–2.5       | 2.9–3.0:1 | 15–35       | 1–2        | 3–4              | 2–3             | 7–9         | 5–6        |
| <i>Picea chihuahuana</i> Martínez                     | 100–170                  | 30–50      | 3.3–3.4:1 | 20–25        | 15–21       | 1.2–1.3:1 | 3–5.5        | 1–1.5       | 2.5–4.0:1 | 12–28       | 1–2        | 3–6              | 1.5–2           | 10–15       | 5–8        |
| <i>Picea crassifolia</i> Komarov                      | 50–110                   | 25–35      | 2.0–3.1:1 | 15–20        | 10–17       | 1.2–1.5:1 | 2–3          | 2–2.5       | 1.0–1.3:1 | 9–35        | 1.5–3      | 3–3.5            | 0.5–1           | 10–13       | 4–5        |
| <i>Picea engelmannii</i> Parry ex Engelmänn           | 25–75                    | 20–35      | 1.3–2.1:1 | 12–28        | 9–19        | 1.3–1.5:1 | 3–5          | 2–2.5       | 1.5–2.3:1 | 12–30       | 1–2        | 1.5–3            | 1–2             | 7–12        | 3.5–5      |
| <i>Picea farreri</i> Page & Rushforth                 | 40–140                   | 25–45      | 1.6–3.1:1 | 8–22         | 8–16        | 1.0–1.4:1 | 2–3.5        | 1.5–2       | 1.3–1.7:1 | 15–25       | 1–1.5      | 3–4              | 1.5–2.5         | 13–16       | 5–6        |
| <i>Picea glauca</i> (Moench) Voss                     | 30–70                    | 12–25      | 2.5–2.8:1 | 12–15        | 8–12        | 1.3:1.5:1 | 2–4          | 1.5–2       | 1.4–2.0:1 | 8–18        | 0.8–1.5    | 2–3              | 0.3–5           | 6–10        | 3–5        |
| <i>Picea glehnii</i> (Fr. Schmidt) Masters            | 35–85                    | 25–38      | 1.4–2.2:1 | 11–18        | 8–12        | 1.4:1.5:1 | 2–3          | 1–1.5       | 1.4–2.0:1 | 6–17        | 0.7–1.5    | 2.5–3            | 1–2             | 7–10        | 4–6        |
| <i>Picea jezoensis</i> (Siebold & Zuccarini) Carrière | 40–90                    | 20–35      | 2.0–2.6:1 | 10–17        | 6–9         | 1.7–1.9:1 | 4–5.5        | 2–4         | 1.4–2.0:1 | 10–24       | 1.5–2      | 2.5–3            | 1–2             | 5.5–10      | 3–5        |
| <i>Picea koraiensis</i> Nakai                         | 40–80                    | 25–40      | 1.5–2.0:1 | 13–19        | 9–16        | 1.2–1.4:1 | 2–5          | 1–1.5       | 1.5–3.6:1 | 12.0–25.0   | 1.5–2      | 3–4              | 2–2.5           | 12–16       | 6–8        |
| <i>Picea koyamae</i> Shirasawa                        | 30–100                   | 25–40      | 1.2–2.5:1 | 6–18         | 6–16        | 1.1–1.1:1 | 2–4          | 1–1.5       | 2.0–2.7:1 | 6.0–20.0    | 1–2        | 2–4              | 1.5–2           | 5–12        | 3–5        |
| <i>Picea likiangensis</i> (Franchet) Pritzel          | 50–150                   | 25–50      | 2.0–3.0:1 | 15–26        | 10–17       | 1.5:1     | 2–6          | 1–4         | 1.5–2.0:1 | 6.0–22.0    | 0.9–1.5    | 2–4              | 1–2             | 7–14        | 2.5–4      |
| <i>Picea mariana</i> (Miller) B.S. & P.               | 15–40                    | 15–28      | 1.0–1.4:1 | 7–13         | 6–10        | 1.2–1.3:1 | 1–3          | 1–2         | 1.0–1.5:1 | 6.0–18.0    | 0.7–1      | 2–2.5            | 1–2             | 5–8         | 3–3.5      |
| <i>Picea maximowiczii</i> Regel ex Masters            | 25–90                    | 25–35      | 1.0–2.6:1 | 13–18        | 10–15       | 1.2–1.3:1 | 2–5          | 1–2         | 1.7–2.5:1 | 8.0–18.0    | 1–1.5      | 3–4.5            | 2.5–3           | 8–10        | 4–5        |

continued

Table 2. continued.

|                                   | Cone length <sup>1</sup> | Cone width | L/W ratio | Scale length | Scale width | L/W ratio | Bract length | Bract width | L/W ratio | Leaf length | Leaf width | Seed body length | Seed body width | Wing length | Wing width |
|-----------------------------------|--------------------------|------------|-----------|--------------|-------------|-----------|--------------|-------------|-----------|-------------|------------|------------------|-----------------|-------------|------------|
| <i>Picea meyeri</i>               | 60-120                   | 25-40      | 2.4-3.0:1 | 10-20        | 10-16       | 1.0-1.3:1 | 4-6          | 1.5-2       | 2.3-3.0:1 | 8.0-30.0    | 1.5-2      | 2.5-4            | 1-2.5           | 10-15       | 4-6.5      |
| Rehder & Wilson                   |                          |            |           |              |             |           |              |             |           |             |            |                  |                 |             |            |
| <i>Picea morrissonicola</i>       | 40-70                    | 25-30      | 1.6-2.3:1 | 12-18        | 10-12       | 1.2-1.5:1 | 2-5          | 1-1.5       | 1.5-3.1:1 | 8.0-20.0    | 0.9-2.5    | 3-3.5            | 1-2.5           | 8-10        | 4-5        |
| Hayata                            |                          |            |           |              |             |           |              |             |           |             |            |                  |                 |             |            |
| <i>Picea novoeitichii</i>         | 70-140                   | 45-65      | 1.6-2.2:1 | 25-32        | 25-30       | 1.0-1.1:1 | 2-10         | 3.5-4       | 1.1-2.6:1 | 15.0-25.0   | 1.7-2      | 5-7              | 2-4.5           | 15-25       | 8-11       |
| Masters                           |                          |            |           |              |             |           |              |             |           |             |            |                  |                 |             |            |
| <i>Picea obovata</i>              | 50-110                   | 20-30      | 2.5-3.7:1 | 14-17        | 9-12        | 1.4-1.6:1 | 2.5-4        | 1-2         | 2.6-2.4:1 | 12.0-20.0   | 0.5-1      | 1.5-2            | 1-1.5           | 10          | 3-4        |
| Ledeboeur                         |                          |            |           |              |             |           |              |             |           |             |            |                  |                 |             |            |
| <i>Picea omorika</i>              | 30-65                    | 20-30      | 1.5-2.2:1 | 10-15        | 10-13       | 1.0-1.2:1 | 2-5          | 1.5-2       | 1.2-2.5:1 | 8.0-23.0    | 1.5-2.5    | 2.1-3            | 1-2.5           | 6-8         | 4-6        |
| (Panić) Purkyne                   |                          |            |           |              |             |           |              |             |           |             |            |                  |                 |             |            |
| <i>Picea orientalis</i> (L.) Link | 45-100                   | 20-33      | 2.3-3.0:1 | 12-17        | 10-15       | 1.1-1.2:1 | 5-6          | 2-4         | 1.5-2.3:1 | 4.0-14.0    | 0.7-1.5    | 3-4              | 2-2.5           | 6-8         | 3-5        |
| <i>Picea pungens</i>              | 50-120                   | 25-45      | 2.0-2.7:1 | 15-24        | 10-15       | 1.5-1.6:1 | 4-7          | 1-1.5       | 3.1-4.7:1 | 15.0-31.0   | 1-1.5      | 2-3              | 1-2             | 6-9         | 5-6        |
| Engelmann                         |                          |            |           |              |             |           |              |             |           |             |            |                  |                 |             |            |
| <i>Picea purpurea</i>             | 25-70                    | 17-30      | 1.5-2.3:1 | 10-15        | 8-12        | 1.3:1     | 3-5          | 1.5-2       | 1.7-2.5:1 | 7.0-14.0    | 0.9-2      | 2-3              | 1-2.5           | 5-8         | 3-4        |
| Masters                           |                          |            |           |              |             |           |              |             |           |             |            |                  |                 |             |            |
| <i>Picea retroflexa</i>           | 80-130                   | 25-50      | 2.6-3.2:1 | 15-20        | 12-17       | 1.2-1.3:1 | 1-2          | 1.5-2       | 0.6-1.0:1 | 10.0-25.0   | 1-2        | 3-4              | 0.5-1           | 8-15        | 4-7        |
| Masters                           |                          |            |           |              |             |           |              |             |           |             |            |                  |                 |             |            |
| <i>Picea rubens</i>               | 25-60                    | 18-35      | 1.4-1.7:1 | 8-15         | 9-13        | 0.9-1.2:1 | 3-6          | 1.5-2       | 1.8-3.0:1 | 10.0-17.0   | 1          | 2-3              | 1-1.5           | 5-9         | 3-5        |
| Sargent                           |                          |            |           |              |             |           |              |             |           |             |            |                  |                 |             |            |
| <i>Picea schrenkiana</i>          | 60-110                   | 25-40      | 2.4-2.8:1 | 13-21        | 12-15       | 1.1-1.4:1 | 2-3.5        | 1.5-2       | 1.2-1.8:1 | 15.0-40.0   | 0.8-1.5    | 4-5              | 2.5-3           | 8-11        | 5-6        |
| Fisher & Meyer                    |                          |            |           |              |             |           |              |             |           |             |            |                  |                 |             |            |
| <i>Picea sitchensis</i>           | 45-100                   | 15-40      | 2.5-3.0:1 | 10-16        | 5-10        | 1.6-2.0:1 | 2-7          | 1.5-3       | 1.3-2.7:1 | 15.0-26.0   | 1-1.5      | 2-4              | 1.5-3           | 6-10        | 4-5        |
| (Bongard) Carrière                |                          |            |           |              |             |           |              |             |           |             |            |                  |                 |             |            |
| <i>Picea smithiana</i>            | 85-200                   | 40-60      | 2.1-3.3:1 | 18-30        | 15-24       | 1.2-1.3:1 | 4.5-10       | 1.5-2       | 2.8-5.0:1 | 25.0-50.0   | 0.6-1      | 4-7              | 3-4             | 13-20       | 7-9        |
| (Wallich) Boissier                |                          |            |           |              |             |           |              |             |           |             |            |                  |                 |             |            |
| <i>Picea spinulosa</i>            | 40-120                   | 25-45      | 1.6-2.7:1 | 12-20        | 8-14        | 1.4-1.5:1 | 3-5          | 1.5-2       | 2.1-2.5:1 | 15.0-35.0   | 0.7-2      | 3-5              | 1-2             | 8-14        | 4-6        |
| (Griffith) Henry                  |                          |            |           |              |             |           |              |             |           |             |            |                  |                 |             |            |
| <i>Picea torano</i>               | 50-120                   | 30-70      | 1.7:1     | 20-28        | 15-25       | 1.1-1.3:1 | 3-5          | 1.5-2       | 2.0-2.8:1 | 10.0-26.0   | 1.5-2.5    | 5-7              | 3-4             | 15-21       | 7-10       |
| (Siebold ex K. Koch)              |                          |            |           |              |             |           |              |             |           |             |            |                  |                 |             |            |
| Koehne                            |                          |            |           |              |             |           |              |             |           |             |            |                  |                 |             |            |
| <i>Picea wilsonii</i>             | 40-80                    | 25-40      | 1.6-2.0:1 | 14-17        | 9-14        | 1.2-1.5:1 | 2-6          | 1.5-2       | 1.3-2.9:1 | 8.0-23.0    | 0.8-2      | 3-4.5            | 2.5-3           | 8-15        | 3-7        |
| Masters                           |                          |            |           |              |             |           |              |             |           |             |            |                  |                 |             |            |
| <i>Picea sverdrupii</i> sp. nov.  | 27-115                   | 12-28      | 2.3-4.1:1 | 4-17         | 5-12        | 0.8-1.4:1 | 5-8          | 1-2         | 3.9-5.0:1 | -           | -          | 2-3.5            | 1-2             | 6.5-9       | 2.5-3      |
| <i>Picea nanseni</i> sp. nov.     | 27-57                    | 12-20      | 2.3-2.8:1 | 6-13         | 4-9.5       | 1.4-1.5:1 | 1.5-2.5      | 1-2         | 1.2-1.5:1 | 3.5-6.5     | 0.5-1      | 1-2              | 1-1.5           | 3.5-7       | 1.5-3.5    |
| <i>Picea palustris</i> sp. nov.   | 27-112                   | 12-32      | 2.3-3.5:1 | 3.5-21       | 3-19        | 1.1-1.2:1 | 2-7          | 1-2.5       | 2.3-3.1:1 | -           | -          | 1.5-3.5          | 0.5-3           | 7-19        | 2.5-8      |

Data have been obtained in part from Kent (1900), Lacassagne (1934), Dallimore & Jackson (1948), Gausson (1966), Hills & Ogilvie (1970); Schmidt-Vogt (1977), Scoggan (1978), Page & Rushforth (1980), Silba (1986), Rushforth (1987), Farjon (1990) and personal observations.

<sup>1</sup> All measurements in mm.

*Collecting localities*

US 116, 184, 220, 234, 235, 236, 237, 520, 563, 567, 568, 587.

*Etymology*

In honour of Fridtjof Nansen, a 19th century Arctic explorer.

*Detailed description*

The cones vary in size with each cone comprising 40–100 imbricate, narrow to wide obovate, woody cone scales that are helically arranged around a central cone axis and attached by a short stalk (Fig. 5). The cone-scale margins are entire, the apex is rounded and the abaxial surface smooth and glabrous (Fig. 86). Each cone scale is subtended by a glabrous, non-exserted bract (Fig. 87). The bract margin is erose to crenate and the apex is emarginate to cuspidate. Each bract possesses a small apical tooth which is an extension of the vascular trace. Resin canals may be visible on each side of the vascular trace. The bract is basally adnate to the cone scale, but is free medially and apically.

The leaves are up to 6.5 mm long and 1 mm wide, falcate, and equifacial. Leaves were recovered either as isolated specimens or attached to shoots. Leaves attached to shoots are helically arranged and loosely appressed along the length of the twig. When terminal buds are present on the twig, the subterminal leaves commonly cover the bud (Fig. 6). The leaf is widest near the middle and narrows acropetally to a mucronate apex. Basipetally, the leaves are attached to pulvini (Fig. 7). Prominent abscission zones on the pulvini indicate that the leaves of this species were periodically shed as seen in the living spruces.

The stomata are amphistomatic and arranged in four inconspicuous parallel bands along the length of the leaf, which correspond to the four sides of the leaf. Each band is composed of approximately four rows of stomata. The outer cuticle surface appears slightly granular and is probably a preservational artifact (Fig. 8). The stomata are inconspicuous, sunken, without stomatal plugs and orientated parallel to the long-axis of the leaf.

The cuticle is poorly preserved and details of the inner cuticular micromorphology are limited. The inner cuticle surface appears to be without ornamentation (Fig. 9). The stomatal complexes are about 40 µm long and 30 µm wide and the inner surfaces of the guard cells are plain (Fig. 10).

Winged seeds of *P. nanseni* were found in the cone scales of some cones (Fig. 11). The seed wings are narrow obovate to narrow oblanceolate in shape, symmetrical and membranous. The margins are entire and

the apex is rounded. The shape of the seed body varies from wide ovate to triangular. The size and shape of *P. nanseni* seeds are typical for the genus, with those of *P. smithiana* (Wallich) Boissier showing the closest similarity to the fossils (Table 2; Figs 11, 19aa).

*Remarks*

Based on the small number of specimens recovered, *P. nanseni* was a rare constituent of the Taxodiaceae-dominated swamp forest communities. The morphology of the *Picea nanseni* cones is consistent among all specimens recovered and cannot be confused with those of *P. sverdrupii*, even when both species occur in the same deposits and they are of the same size. The cones of *P. nanseni* are consistently much smaller than those of *P. sverdrupii* and are prominently tapered basally and apically resembling the cones of *P. torano* (Siebold ex K. Koch) Koehne. The unique combination of features and limited occurrence in the basinal forest communities indicates that *P. nanseni* is a distinct species.

***Picea palustris* LePage sp. nov.**

(Figs 12, 13, 88, 89)

*Specific diagnosis*

CONE ovoid to oblong-cylindrical in shape, up to 112 mm long and 32 mm wide; composed of 50–150+ imbricate, resinous, woody cone scales. CONE SCALE deltoid in shape, up to 21 mm long and 19 mm wide; margin entire; apex rounded with some scales possessing a small apical projection; abaxial surface glabrous. BRACT subtending cone scale lanceolate in shape, hidden, up to 7 mm long and 2.5 mm wide; basally adnate to the cone scale, but free above; apex acute to acuminate; margin entire; glabrous. SEEDS two per scale, winged, up to 19 mm long and 8 mm wide; wing membranous, slightly asymmetrical, narrow obovate to oblanceolate, apex slightly falcate; seed-body oval to round, up to 3.5 mm long and 3 mm wide.

*Holotype*

USPC specimen US 588-5590.

*Collecting locality*

US 588.

*Etymology*

Latin: *palustris* = swamp.

*Detailed description*

The seed cones of *P. palustris* are as long as those of *P. sverdrupii*, but considerably wider, even after taking

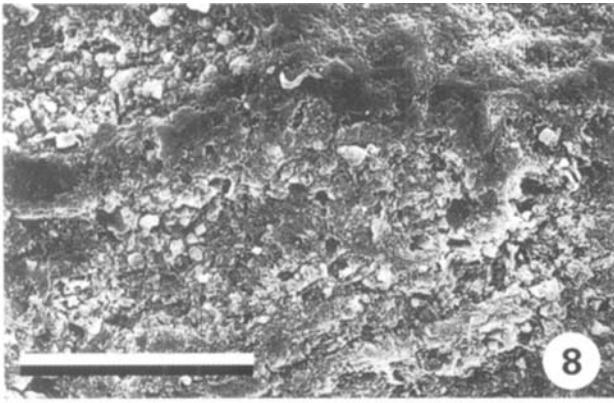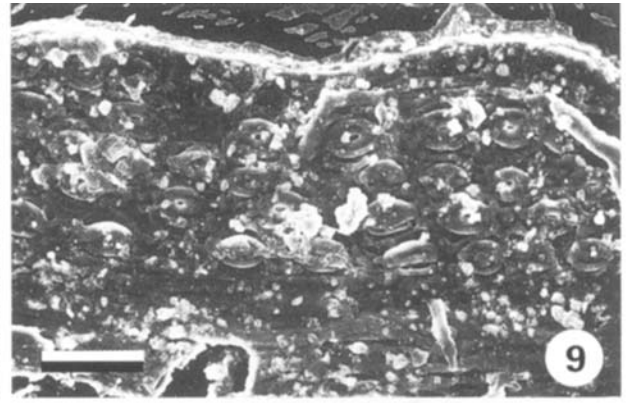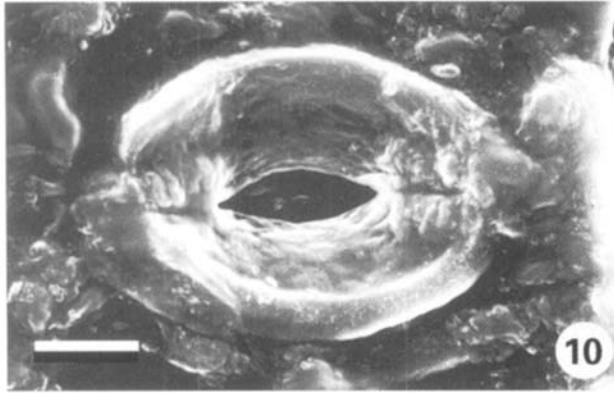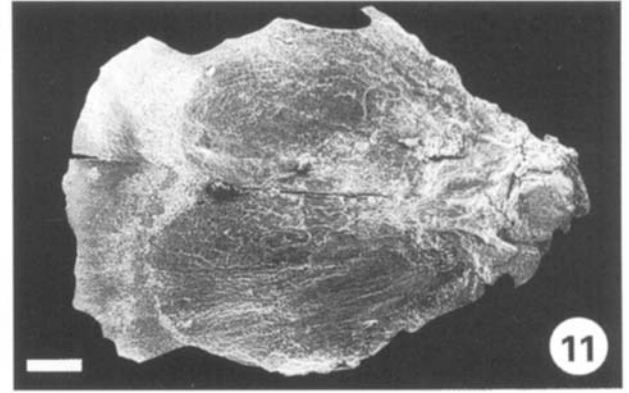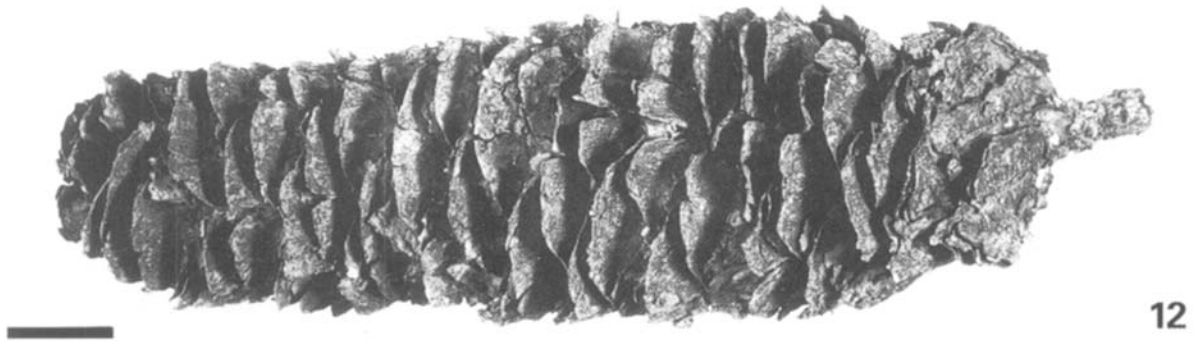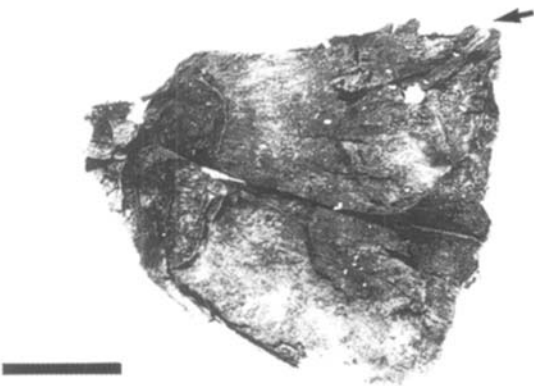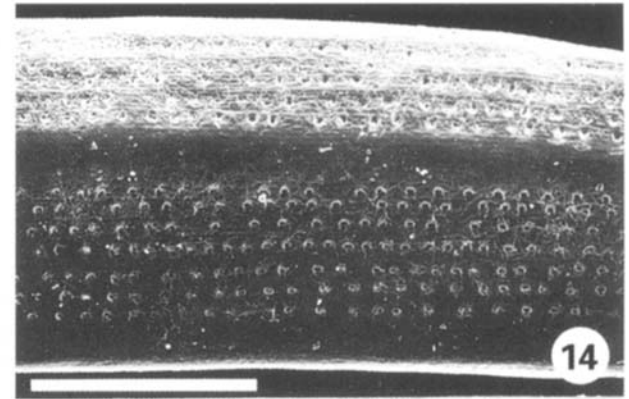

compression into account. The cones are oval to oblong-cylindrical in shape and have broadly-rounded apices and pedunculate bases (Fig. 12). Cones are composed of 50–150+ imbricate, deltoid, woody cone scales that are helically arranged around a central cone axis and attached by a short pedicel. The cone scales are up to 21 mm long and 19 mm wide, resinous and much less woody than those of *P. sverdrupii* and *P. nanseni*. The scales appear to be reflexed, but this attribute may be due to the cleaning process. The margins are entire, the apex broadly rounded and the abaxial surface glabrous (Fig. 88). Some of the cone scales possess a small apical projection and resemble the cone scales of some Chinese spruces such as *P. brachytyla*. Each cone scale is subtended by a non-exserted bract (Fig. 89). The bract is lanceolate in shape, with entire margins and an acute to acuminate apex. The bracts are free from the cone scales medially and apically, but are adnate basally.

Winged seeds of *P. palustris* were found in the cone scales of some cones (Fig. 13). The seed wings are narrow obovate to narrow oblanceolate in shape, slightly asymmetrical and membranous. The margins are entire and the apex is slightly falcate. The shape of the seed body varies from wide oval to round. The size and shape of *P. palustris* seeds are typical for the genus and most closely resemble those of *P. koraiensis* Nakai (Table 2; Figs 13, 19k).

#### Remarks

The cones of *Picea palustris* are rare and known only from one autochthonous litter horizon. Recognition of a third species of *Picea* is based exclusively on the distinct morphology of the cones and its highly-restricted distribution. However, the preservation of these cones is such that they are nearly flattened and almost unrecognizable in the field. Consequently, the rarity of *P. palustris* cones relative to those of *P. sverdrupii* and *P. nanseni* may be due to the difficulty in

recognizing as a cone what initially appears to be a flattened piece of wood.

## DISCUSSION

### TAXONOMIC CONSIDERATIONS

Current classification systems of living *Picea* are based on a whole-tree concept, in which one or more of the following features are recognized: cross-sectional shape of the leaves; degree of pubescence of the twigs; arrangement of the stomata on the leaves; colour of the leaves and new growth shoots; length and shape of the cones; shape and degree of pubescence of the buds; and cone-scale morphology (Willkomm, 1887; Mayr, 1890; Lacassagne, 1934; Dallimore & Jackson, 1948; Schmidt-Vogt, 1977; Gaussen, 1966; Liu, 1982; Silba, 1986; Schmidt, 1989).

The genus was originally divided into two sections, *Eupicea* Willkomm and *Omorika* Willkomm, on the basis of leaf shape (Willkomm, 1887). Species assigned to *Eupicea* possessed equifacial and amphistomatic leaves, while those assigned to *Omorika* possessed dorsiventrally flattened and epistomatic leaves. However, it is important to remember that Willkomm's system of classification was based on only eight species.

Mayr (1890) later established a new classification system for the genus that expanded on Willkomm's (1887) scheme. Using the features of the seed cone, the cross-sectional shape of the leaf and the location of the stomata on the leaf, Mayr recognized 17 species of *Picea* and subdivided the genus into three sections, *Morinda* Mayr, *Casicta* Mayr and *Omorika*. Species assigned to *Morinda* possessed equifacial amphistomatic leaves and hard and woody cone scales, those of *Casicta* possessed dorsiventrally-flattened epistomatic leaves and flexible cone scales, while species assigned to *Omorika* possessed broad, rhomboid-shaped epistomatic leaves and hard and woody cone scales.

Since the introduction of Willkomm's (1887) system,

**Figures 8–14.** Species of *Picea*. Fig. 8. *Picea nanseni* sp. nov. SEM of outer surface of the leaf and rows of sunken stomata. US-SEM 139 (US184-5594). Scale bar=0.1 mm. Fig. 9. *Picea nanseni* sp. nov. SEM of non-ornamented inner surface of the leaf cuticle. The stomata are arranged parallel to the long axis of the leaf in four rows. Compare with the inner cuticle surface of the *P. jezoensis* leaf shown in Figure 16 and note the differences. US-SEM 146 (US220-5593). Scale bar=0.1 mm. Fig. 10. *Picea nanseni*. SEM close-up of a stomatal complex. Compare with the stomatal complex of *P. jezoensis* shown in Figure 17 and note the differences. US-SEM 154 (US184-5594). Scale bar=10 mm. Fig. 11. *Picea nanseni* sp. nov. Winged seeds still adherent to the adaxial surface of the cone scale. Note their similarity to the *P. smithiana* seed shown in Figure 19aa. US-SEM 155 (US220-5572). Scale bar=1.0 mm. Fig. 12. *Picea palustris* sp. nov. Cone after cleaning showing the slightly reflexed cone scales. Note the basal peduncle. US588-5590. Scale bar=10 mm. Fig. 13. *Picea palustris* sp. nov. Winged seeds still adherent to the adaxial surface of the cone scale showing the slightly falcate apex of the seed wing (arrow). Note its similarity to the *P. koraiensis* seed shown in Figure 19k. US588-5590. Scale bar=5 mm. Fig. 14. *Picea likiangensis*. SEM of parallel arrangement of the stomatal bands on the outer surface of the leaf and the rows of sunken stomata within each band. US-SEM 144 (A 1779). Scale bar=1.0 mm.

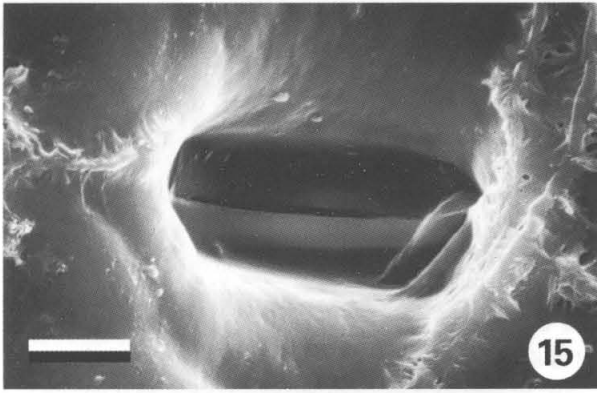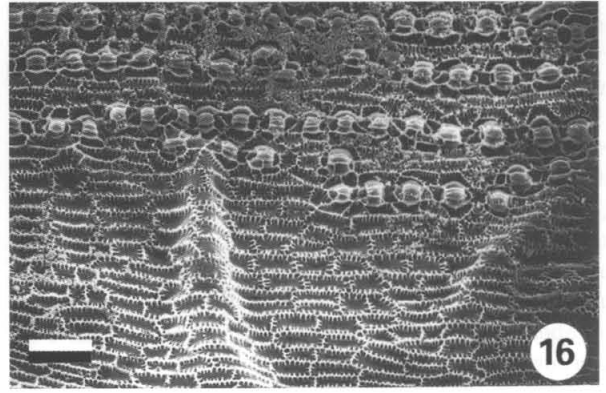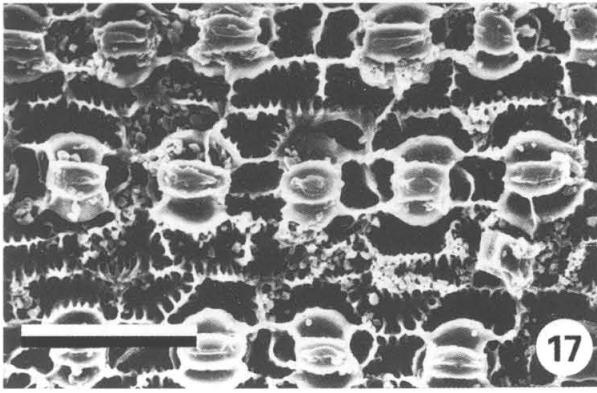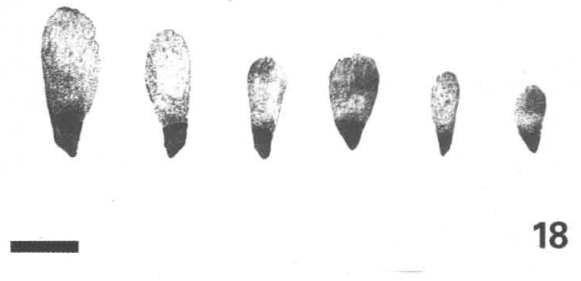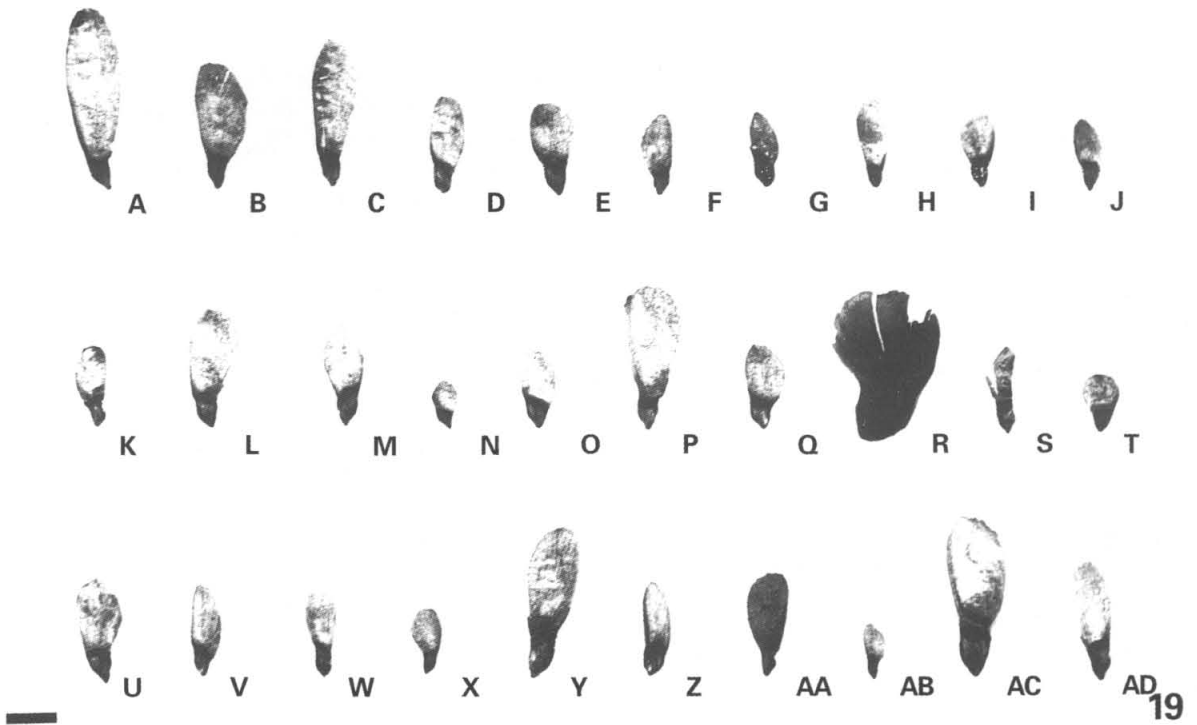

**Figures 15–19.** Fig. 15. *Picea likiangensis*. SEM close-up of a sunken stomatal complex on the outer surface of the leaf. US-SEM 144 (A 1779). Scale bar = 10 mm. Fig. 16. *Picea jezoensis*. SEM of the inner surface of the leaf cuticle. Note the buttresses arranged perpendicular to the anticlinal walls. Compare with the inner cuticle surface of



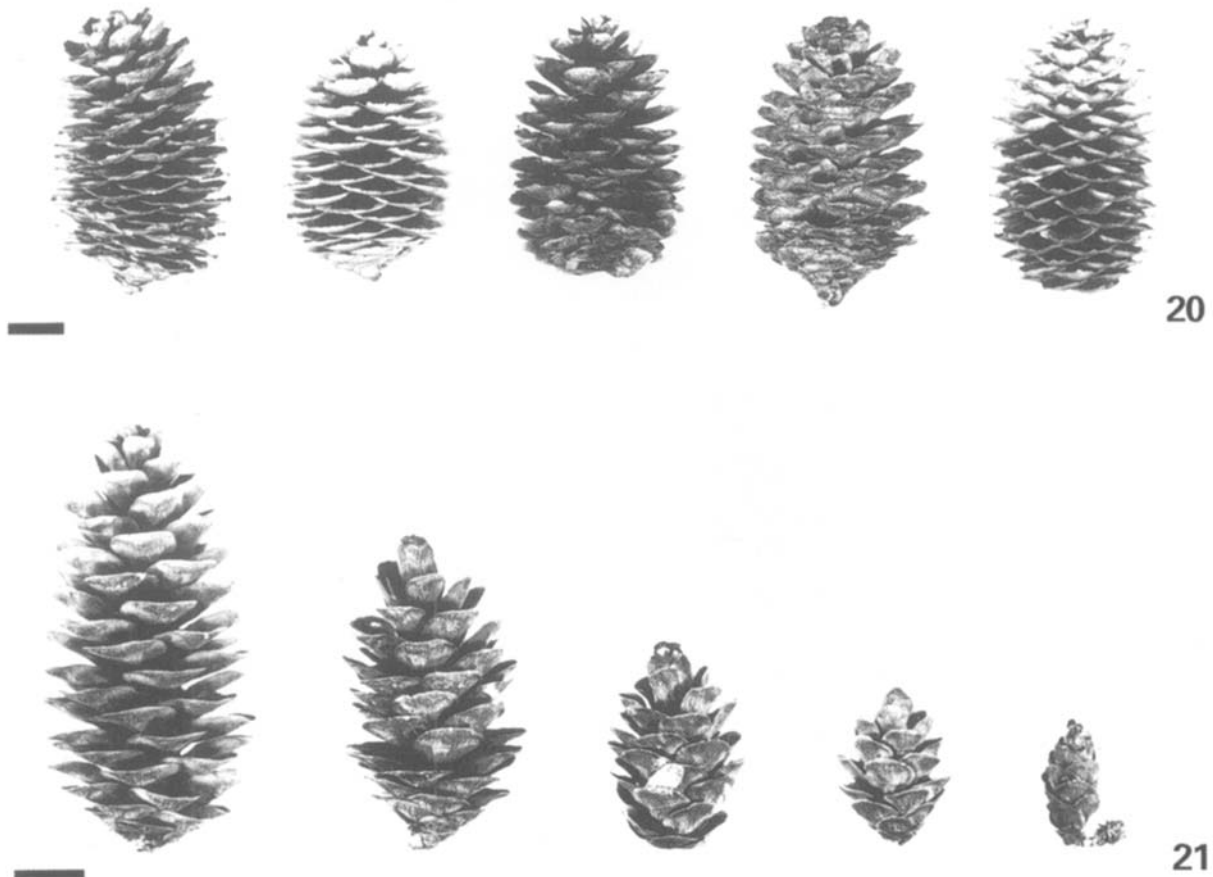

**Figures 20 & 21.** Fig. 20. Cones representing five species of *Picea* showing the similarity in size and shape. (A) *P. wilsonii* (A 2053), (B) *P. schrenkiana* (A 806), (C) *P. koyamae* (MO 1639472), (D) *P. morrisonicola* (US10901) and (E) *P. glehnii* (SASK 118258). Scale bar = 10 mm. Fig. 21. *Picea glauca*. Cones collected from one tree showing the range in size and shape. SASK 118259. Scale bar = 10 mm.

*P. nansonii* sp. nov. shown in Figure 9. US-SEM 145 (SASK 118257). Scale bar = 0.1 mm. Fig. 17. *Picea jezoensis*. SEM close-up of the stomatal complexes. The inner flanges of the subsidiary cells are plain and conspicuous. Compare with the stomata of *P. nansonii* sp. nov. shown in Figures 9 and 10. US-SEM 145 (SASK 118257). Scale bar = 0.1 mm. Fig. 18. *Picea glauca*. Seeds taken from one *P. glauca* cone showing the range in size and shape of the seed wing. SASK 118259. Scale bar = 5 mm. Fig. 19. Seeds from most species of the genus *Picea*. (A) *P. abies* (A Johnson, unnumbered), (B) *P. alcoquiana* (A Lindquist, unnumbered), (C) *P. asperata* (A 14815), (D) *P. brachytyla* (A 3411), (E) *P. breweriana* (MO 984840), (F) *P. engelmannii* (SASK 94398), (G) *P. farreri* (MO 2060), (H) *P. glauca* (SASK 905), (I) *P. glehnii* (SASK 118258), (J) *P. jezoensis* (SASK 118257), (K) *P. koraiensis* (A 334), (L) *P. koyamae* (MO 807113), (M) *P. likiangensis* (A 1779), (N) *P. mariana* (SASK 909), (O) *P. maximowiczii* (A Tschonoski, unnumbered), (P) *P. meyeri* (A 813), (Q) *P. morrisonicola* (MO 1627050), (R) *P. neveitchii* (A 2054), (S) *P. obovata* (A 281), (T) *P. omorika* (A Pančić, unnumbered), (U) *P. orientalis* (A 5442), (V) *P. pungens* (SASK 19591), (W) *P. purpurea* (US4059), (X) *P. rubens* (ALTA 25789), (Y) *P. schrenkiana* (A Smimov, unnumbered), (Z) *P. sitchensis* (SASK 94474), (AA) *P. smithiana* (US2242336), (AB) *P. spinulosa* (A unnumbered), (AC) *P. torano* (A Maximowicz, unnumbered) and (AD) *P. wilsonii* (MO 2929264). Scale bar = 10 mm.

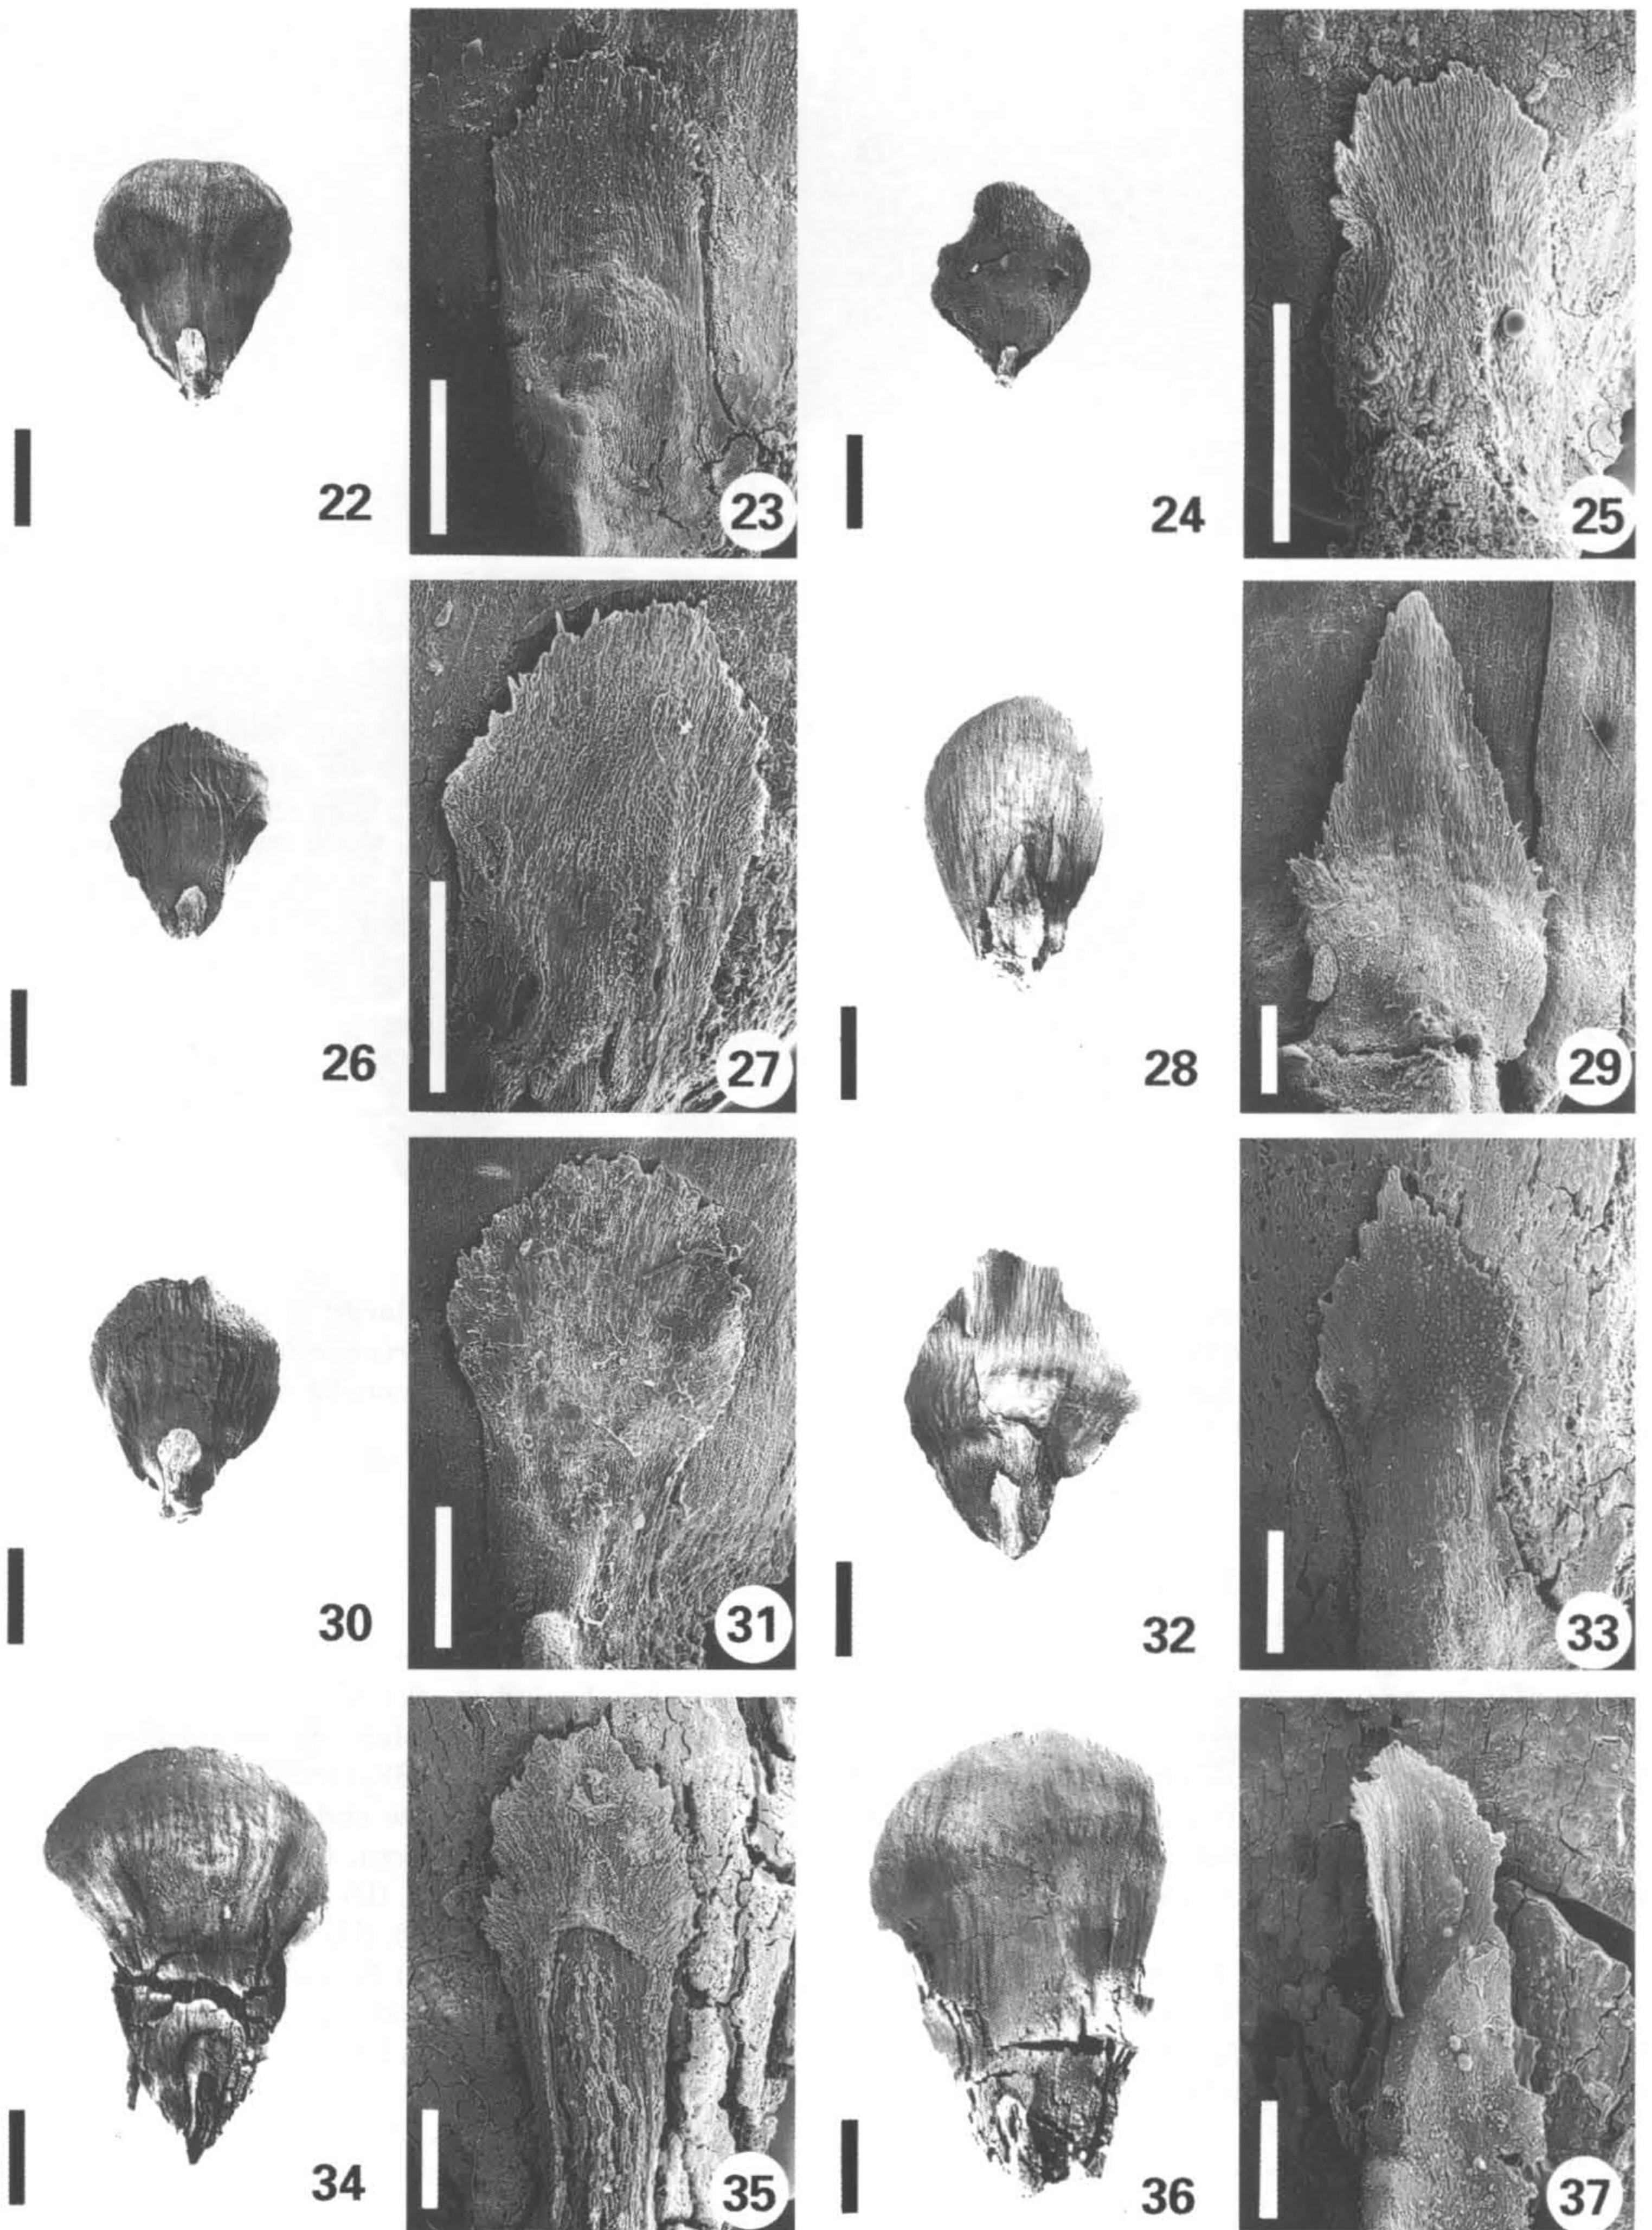

Figures 22–36 (even numbers). Typical cone scales representing species of *Picea* showing the subtending bract. Fig. 22. *P. glauca* (II). SASK 118259. Fig. 24. *P. mariana* (II). SASK 118260. Fig. 26. *P. rubens* (II). ALTA 25789. Fig. 28.



a number of classification schemes proposed follow, in part, either Willkomm's two-section or Mayr's three-section system. Depending on the system of classification used, 20–50 species have been recognized (Pardé, 1911; Dallimore & Jackson, 1948; Bobrov, 1970; Schmidt-Vogt, 1977; Liu, 1982; Silba, 1984, 1986; Krüssmann, 1985; Rushforth, 1987; Schmidt, 1988; Farjon, 1990). Tenets common to these classification schemes include an emphasis of vegetative features rather than the more reliable features of the seed cones and a disregard for recognition of the natural variability of morphological features.

When internal anatomical features were considered, Miller (1989) concluded that living species of *Picea* assigned to *Eupicea* (*Picea*), *Omorika* or *Casicta* were no more similar to one another than to members of the other two sections. Miller further noted that assignment of anatomically described fossil *Picea* cones to any one of these three sections did little to resolve or improve our understanding of the phylogeny of the genus. Clearly, the inability of current classification schemes to shed light on phylogenetic aspects within the genus and the lack of consensus regarding the number of species, illustrate the need to reconsider the currently used features and identify more taxonomically-useful features essential for circumscription of the genus.

The use of reproductive characters for phylogenetic interpretation must be chosen carefully. While it is true that detailed study of the anatomical features of seed cones often provide useful data to understand phylogeny, Ohsawa (1994) urges caution when using anatomical features of seed cones such as vasculature for taxonomic circumscription and phylogenetic interpretation. Such features are variable and the extent of variability among taxa has not yet been fully determined.

Examination of fossil and living species of *Picea* revealed that the extent of intra- and inter-specific variability of such characters as size and shape of the leaves, seeds and cones is considerable, and has made identification and classification of fossil and living species difficult (Table 2). Although it is evident that more than one species of *Picea* is represented in the collection of Axel Heiberg spruces, the classification

schemes currently in use for living *Picea* provide little useful information for the identification and separation of fossil representatives. Therefore, it was deemed necessary to examine living and fossil *Picea* for characters possessing the morphological stability needed for discrimination among specimens of fossil *Picea*.

#### LEAVES

Phenotypic differentiation of leaves among living species of *Picea* is slight. Leaves of *Picea* are short, linear, up to 50 mm long and 3 mm wide, equifacial or dorsiventrally flattened, epistomatic or amphistomatic, with inconspicuous sunken stomata (Table 2; Figs 14, 15). Internally, one centrally positioned vascular trace and two marginal resin canals are present. Species within the genus have been traditionally separated into two or three groups based on their cross-sectional shape and arrangement of the stomata (Silba, 1986; Farjon, 1990). Although comparative and detailed micromorphological study of the inner cuticle surfaces of living *Picea* leaves may yield taxonomically useful information, a comprehensive survey of this nature has yet to be done.

The external surface of *P. nansonii* leaves is consistent with that seen on the leaves of living *Picea*. However, the internal cuticle surface of *P. nansonii* differs markedly from that described and illustrated in leaves of *P. jezoensis* (Siebold & Zuccarini) Carrière, *P. aurantiaca* Masters, *P. engelmannii*, *P. sitchensis* (Bongard) Carrière and *P. alcoquiana* (Veitch ex Lindley) Carrière (Florin, 1931). The inner cuticle surface of these species, as exemplified by *P. jezoensis*, reveals a series of anticlinal walls that are basally buttressed and arranged perpendicular to the periclinal walls (Fig. 16) and tetracytic subsidiary cells with conspicuous flanges (Fig. 17). The inner cuticle surface of *P. nansonii* shows smooth, straight, non-ornamented walls (Figs 9, 10). The cuticle is poorly preserved and little else can be reliably said about the internal micromorphology of the leaves. The inner cuticular features of *P. nansonii* are not known to occur in any of the species examined by us or in those reported by Florin (1931). Further analyses of the inner cuticle surface of other living

*P. sitchensis* (I). MO 1231478. Fig. 30. *P. engelmannii* (I). SASK 94398. Fig. 32. *P. pungens* (I). SASK 19591. Fig. 34. *P. breweriana* (II). MO 1635409. Fig. 36. *P. chihuahuana* (II). MO 1225972. Scale bar = 5 mm. The numerals (I) and (II) in Figures 22–88 (even numbers only) indicate whether the species belongs to the group possessing thin flexible scales (I) or the group possessing thick woody scales (II). Figures 23–37 (odd numbers). SEMs of *Picea* species showing a close-up of the bract. Fig. 23. *P. glauca*. US-SEM 79 (SASK 118259). Fig. 25. *P. mariana*. US-SEM 100 (SASK 118260). Fig. 27. *P. rubens*. US-SEM 98 (ALTA 25789). Fig. 29. *P. sitchensis*. US-SEM 113 (MO 1231478). Fig. 31. *P. engelmannii*. US-SEM 99 (SASK 94398). Fig. 33. *P. pungens*. US-SEM 75 (SASK 19591). Fig. 35. *P. breweriana*. US-SEM 112 (MO 1635409). Fig. 37. *P. chihuahuana*. US-SEM 110 (MO 1225972). Scale bar = 1.0 mm.

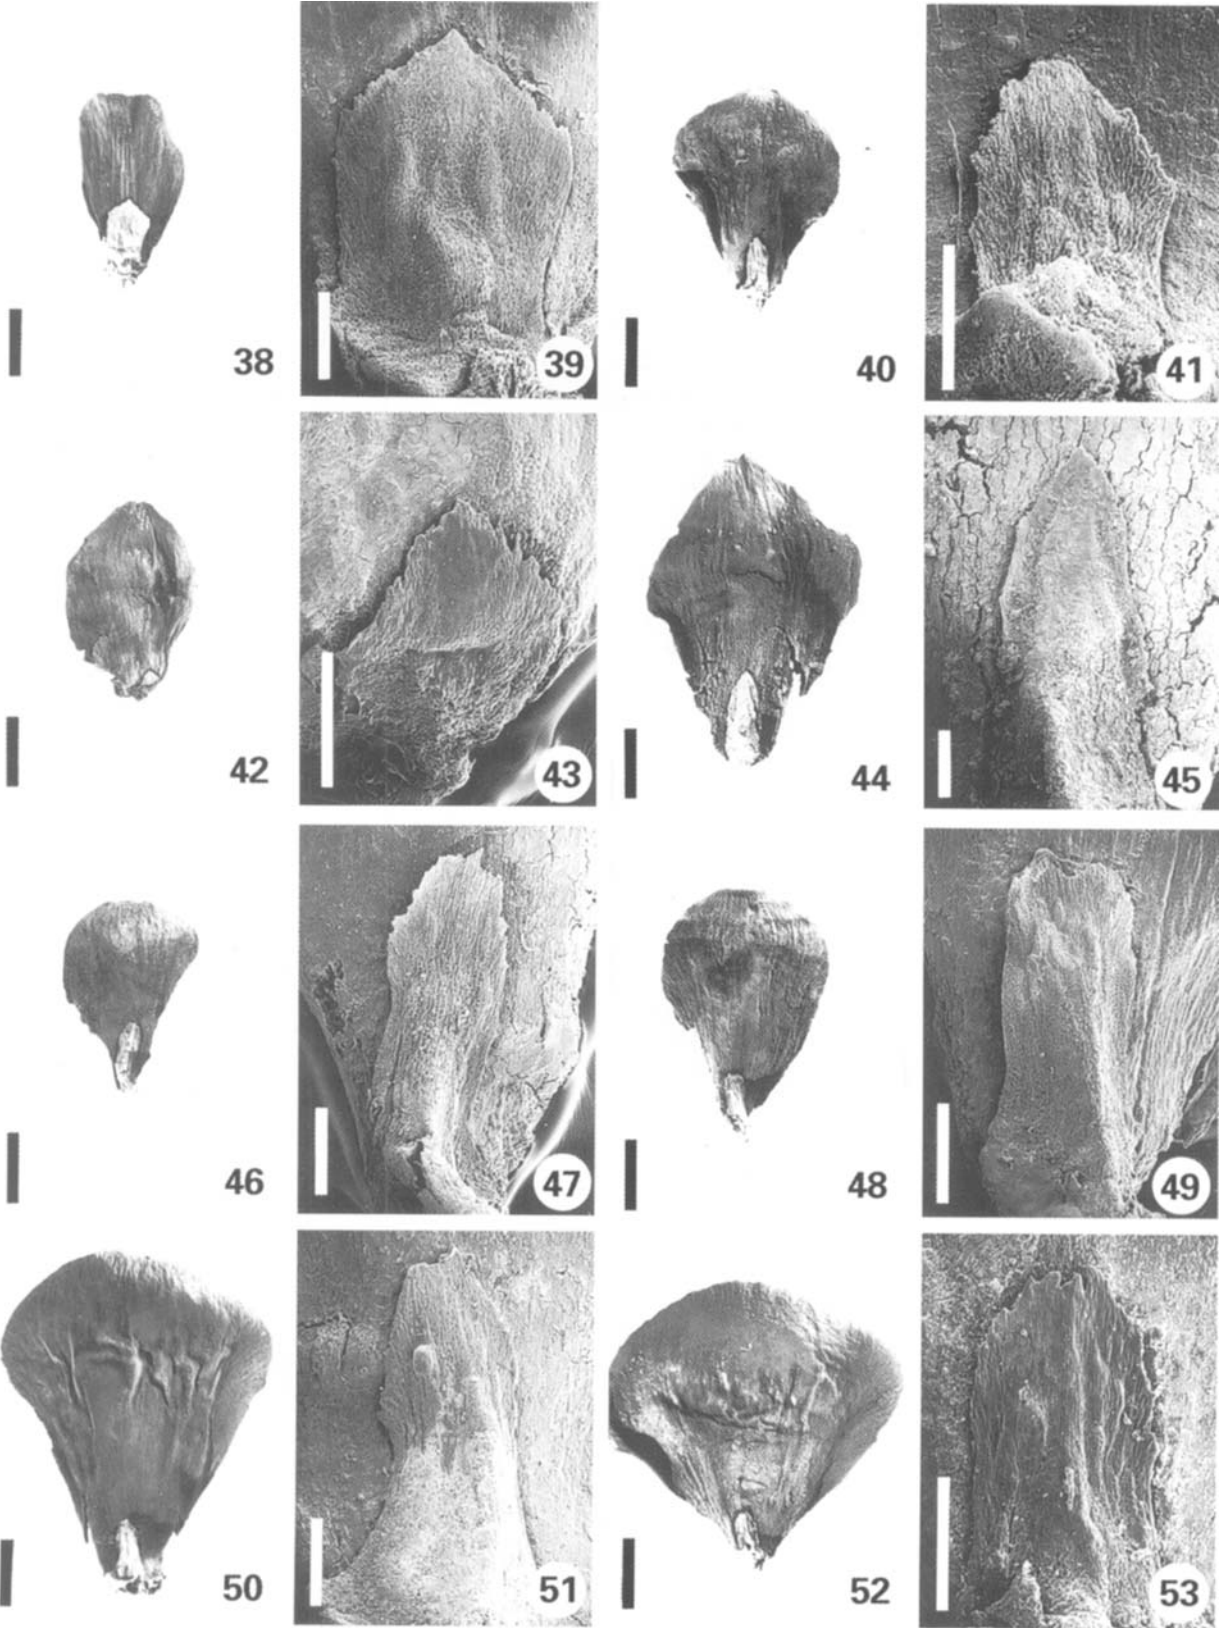

species of *Picea* may, however, reveal features similar to those found in *P. nanseni*.

*Picea* leaves described and figured from late Eocene deposits in British Columbia (Penhallow, 1908) and Nevada (Axelrod, 1966) and Oligocene/Miocene deposits in Russia (Dorofeev, 1963, 1970, 1972; Akhmetiev, 1973; Rayushkina, 1979) resemble those of *P. nanseni* and living *Picea* in external morphology. However, none of these reports include descriptions of the inner cuticle surfaces, and further comparison between the fossils and living representatives of the genus is not possible. Moreover, until the diagnostic value of cuticle micromorphology within and between species under different environmental conditions can be assessed, the use of cuticular features for species circumscription is deemed inappropriate.

#### SEEDS

Most species of living *Picea* possess seeds that are remarkably similar to one another in size and in shape and may not be distinguishable at the species level (Fig. 19). Although the natural intraspecific range of size and shape of *Picea* seeds is not well documented, it is considerable in some species and demonstrates the need for detailed morphological and statistical analyses to determine the range of variation and usefulness of such features for phylogeny (Fig. 18). Until such studies are undertaken and given our present understanding of seed morphology it is unlikely that differences or similarities in seed morphology have any meaningful phylogenetic significance. Consequently, assignment of isolated fossil seeds to biologically meaningful taxa is problematic because the seeds of different species may be indistinguishable. Reliable assignment should be limited either to seeds still retained in cone scales possessing bracts or isolated seeds associated with only one type of seed cone. Yet at least ten species of fossil *Picea* have been established using slight differences in the size and shape of the seed (MacGinitie, 1953; Tanai, 1955, 1961; Tanai & Onoé, 1961; Axelrod, 1966; Tanai & Suzuki, 1972; Rayushkina, 1979). It is doubtful whether these species are truly representative

of the actual species diversity, which further complicates interpretation of taxonomic relationships and phylogeny.

#### SEED CONES

Taxonomists have commonly used such characters as cone scale width to length ratio, length of the seed wing to scale length, taper ratio, cone size and form, cone-scale size and form and bract size and form as a basis for identifying and classifying species of living *Picea* (Horton, 1959; Ogilvie & Rudloff, 1968; Roche, 1969; Hills & Ogilvie, 1970). However, differentiation of cones into discrete, species-specific organs among some of the living species of *Picea* can be a futile exercise (Fig. 20), while in others the intraspecific variability of such features as cone and cone-scale size and shape is considerable (Fig. 21). Clearly, the degree of inter- and intraspecific variability among fossil and living *Picea* limits the taxonomic and systematic usefulness of most features of the cone and demonstrates the need to exercise caution when erecting new species using cone shape and size alone (Table 2).

Nevertheless, within the genus, sub-division of species into two fundamentally different and broad groups using cone-scale morphology is possible. Group I, which includes *P. abies*, *P. obovata*, *P. glehnii* (Fr. Schmidt) Masters, *P. jezoensis*, *P. purpurea* Masters, *P. likiangensis* (Franchet) Pritzl, *P. farreri* Page & Rushforth, *P. brachytyla*, *P. sitchensis*, *P. engelmannii* and *P. pungens* Engelmann, possesses cone scales that are thin, flexible and ovate to very-wide obovate in shape (Figs 28, 30, 32, 38, 40, 42, 44, 64, 68, 70 and 72). Group II includes the remaining twenty-four species, and possesses cone scales that are thicker, woodier, narrow to very-wide obovate in shape and have rounded apices (Figs 22, 24, 26, 34, 36, 46, 48, 50, 52, 54, 56, 58, 60, 62, 66, 74, 76, 78, 80 and 82). It should be noted, however, that segregation of species may not always be precise, for *P. engelmannii*, *P. glauca* and *P. rubens* Sargent possess cone scales exhibiting features common to both groups. The separation here of *Picea* into two groups is by no means meant to imply that

**Figures 38–52** (even numbers). Typical cone scales of species of *Picea* showing the subtending bract. Fig. 38. *P. jezoensis* (I). SASK 118257. Fig. 40. *P. glehnii* (I). SASK 118258. Fig. 42. *P. obovata* (I). A 281. Fig. 44. *P. abies* (I). A Johnsson, unnumbered. Fig. 46. *P. koraiensis* (II). A 334. Fig. 48. *P. morrisonicola* (II). A 10901. Fig. 50. *P. torano* (II). A Maximowicz, unnumbered. Fig. 52. *P. alcoquiana* (II). A Wilson, unnumbered. Scale bar = 5 mm. Figures 39–53 (odd numbers). SEMs of *Picea* species showing a close-up of the bract. Fig. 39. *P. jezoensis*. US-SEM 78 (SASK 118257). Fig. 41. *P. glehnii*. US-SEM 114 (SASK 118258). Fig. 43. *P. obovata*. US-SEM 104 (A 281). Fig. 45. *P. abies*. US-SEM 80 (A Johnsson, unnumbered). Fig. 47. *P. koraiensis*. US-SEM 101 (A 334). Fig. 49. *P. morrisonicola*. US-SEM 102 (A 10901). Fig. 51. *P. torano*. US-SEM 97 (A Maximowicz, unnumbered). Fig. 53. *P. alcoquiana*. US-SEM 96 (A Wilson, unnumbered). Scale bar = 1.0 mm.

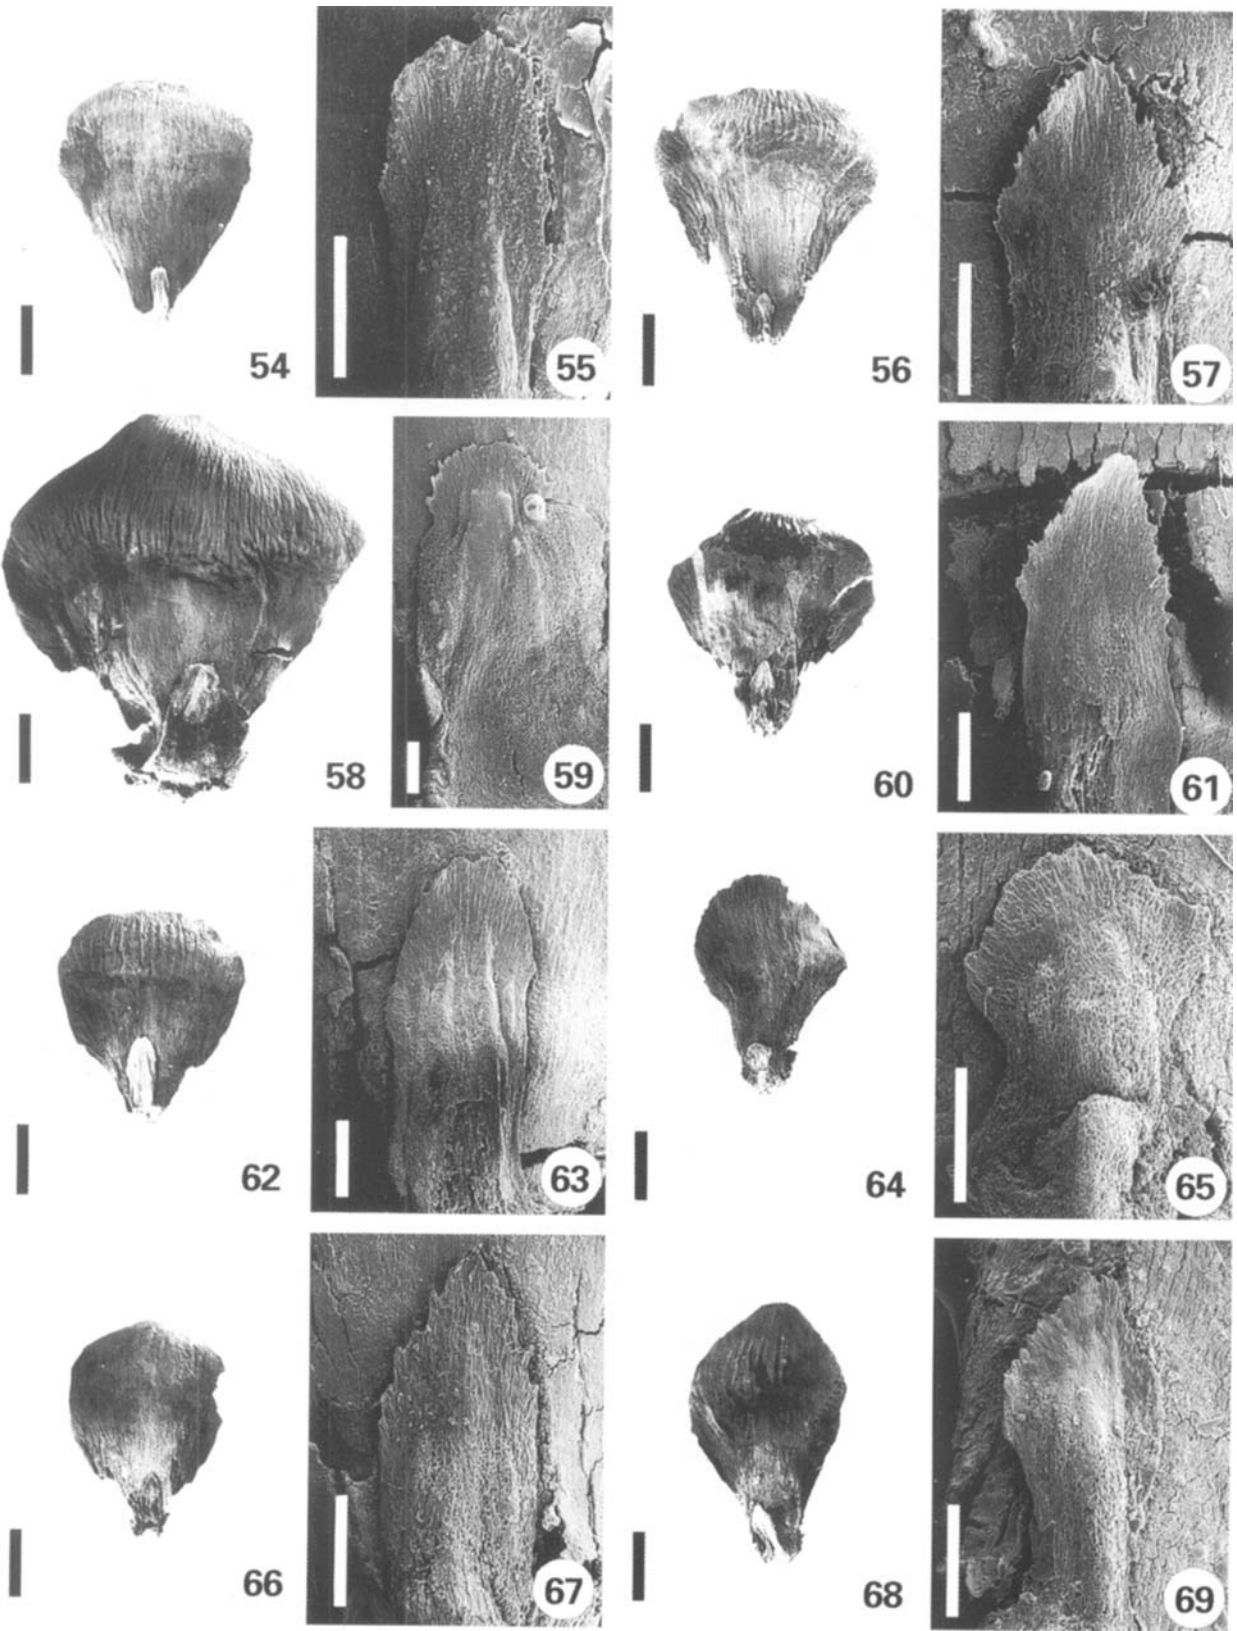

phylogenetic relationships between the taxa of each group exist, but like all other systems of classification currently in use for the genus, it provides an efficient method to quickly discriminate among taxa.

The large number of well-preserved seed cones from Axel Heiberg provided an opportunity to assess the intraspecific variability of cone features corresponding to that available for living species. The results indicate that the range of morphological variation of the features examined in *P. sverdrupii* were comparable to that seen in living species of *Picea* (Table 2; Figs 3, 19), and that such features as cone and cone-scale size and shape alone are inadequate for interpreting the taxonomy and systematics of fossil spruces. Although the number of cones of *P. nansonii* and *P. palustris* is limited, these species may still be meaningfully compared to living *Picea*.

The cones of *P. sverdrupii*, *P. nansonii* and *P. palustris* show affinity with the Group II spruces that possess thick, woody cone scales with rounded apices (Figs 84, 86 and 88). Although the dimensions of the cones and cone scales of fossil and living spruces are similar for many species, and alone, may not be reliably used for taxonomic and systematic purposes, the overall morphology of the cone scales combined with features of the bract are useful for identification and assessment of phylogenetic relationships.

#### BRACETS

Lacassagne (1934) first recognized the significance of the bract for *Picea* taxonomy and indicated that the form of the bract was an important characteristic for species identification. Despite Lacassagne's insight into the problems associated with species identification and classification of living *Picea* and the ability to use the bract to assist in the identification of species, the only bract character he used was whether the bracts were greater than or less than one-half of the length of the cone scale.

Bract morphology has been shown to be consistent within species and useful in segregating species in other genera of conifers, such as *Abies* Miller, *Larix* Miller, *Pseudolarix* Gordon and *Tsuga* (Patschke, 1913; Lacassagne, 1934; Gaussen, 1966; Lui, 1971; LePage, 1991; LePage & Basinger, 1991, 1995). Consequently,

understanding of the range of bract size and form among living and fossil representatives of *Picea* was deemed critical to better understanding the taxonomy and systematics of living and fossil *Picea*.

Bract morphology of each living and fossil species examined was found to be generally consistent among the specimens examined, with each species exhibiting a unique form and providing a basis for identification and separation of species (Figs 23–89, odd numbers only). Among the living species, the bracts of *P. maximowiczii* Regel ex Masters, *P. koraiensis* and *P. wilsonii* Masters show the closest morphological similarity to those of *P. sverdrupii* (Figs 47, 55, 63, 85); those of *P. farreri*, *P. alcoquiana* and *P. smithiana* show the closest similarity to the bracts of *P. nansonii* (Figs 53, 73, 77, 87); and the bracts of *P. omorika* (Pančić) Purkyne, *P. jezoensis* and *P. obovata* are most similar to those of *P. palustris* (Figs 39, 43, 83, 89).

#### PHYLOGENETIC RELATIONSHIPS AND HYBRIDIZATION

There is evidence that indicates the morphology of the cone scale and bract may be phylogenetically significant (LePage & Basinger, 1991, 1995). Based on comparative morphology of the living and fossil representatives of the genus, the species of *Picea* fall into two groups. The first group possesses cone scales that are thin and flexible, with fimbriate margins, while the second group possesses cone scales that are thick and woody, with entire margins. Although separation of the genus into two groups using features of the cone scales is admittedly artificial, molecular data, in part, support these groupings. In a study where the restriction fragment length polymorphisms (RFLPs) of the *cpDNA* from 31 species of *Picea* were analysed phenetically and cladistically, Sigurgeisson & Szmidt (1993) generated a number of topologies illustrating the inter-specific relationships within the genus. Their unweighted pair-group method with arithmetic mean (UPGMA) tree showed four groupings. The first group consisted of *Picea breweriana* S. Watson; the second included *P. engelmannii*, *P. glauca* and *P. mexicana*; the third *P. sitchensis*; and the fourth included the other 26 species that were divided into three nested

**Figures 54–68** (even numbers). Typical cone scales of species of *Picea* showing the subtending bract. Fig. 54. *P. maximowiczii* (II). A 7526. Fig. 56. *P. koyamae* (II). A 7523. Fig. 58. *P. neveitchii* (II). A 2054. Fig. 60. *P. meyeri* (II). A 813. Fig. 62. *P. wilsonii* (II). A 2114. Fig. 64. *P. purpurea* (I). A 4059. Fig. 66. *P. asperata* (II). A 14444. Fig. 68. *P. brachytyla* (I). A 3411. Scale bar = 5 mm. Figures 55–69 (odd numbers). SEMs of *Picea* species showing a close-up of the bract. Fig. 55. *P. maximowiczii*. US-SEM 84 (A 7526). Fig. 57. *P. koyamae*. US-SEM 85 (A 7523). Fig. 59. *P. neveitchii*. US-SEM 103 (A 2054). Fig. 61. *P. meyeri*. US-SEM 88 (A 813). Fig. 63. *P. wilsonii*. US-SEM 89 (A 2114). Fig. 65. *P. purpurea*. US-SEM 87 (A 4059). Fig. 67. *P. asperata*. US-SEM 90 (A 14444). Fig. 69. *P. brachytyla*. US-SEM 91 (A 3411). Scale bar = 1.0 mm.

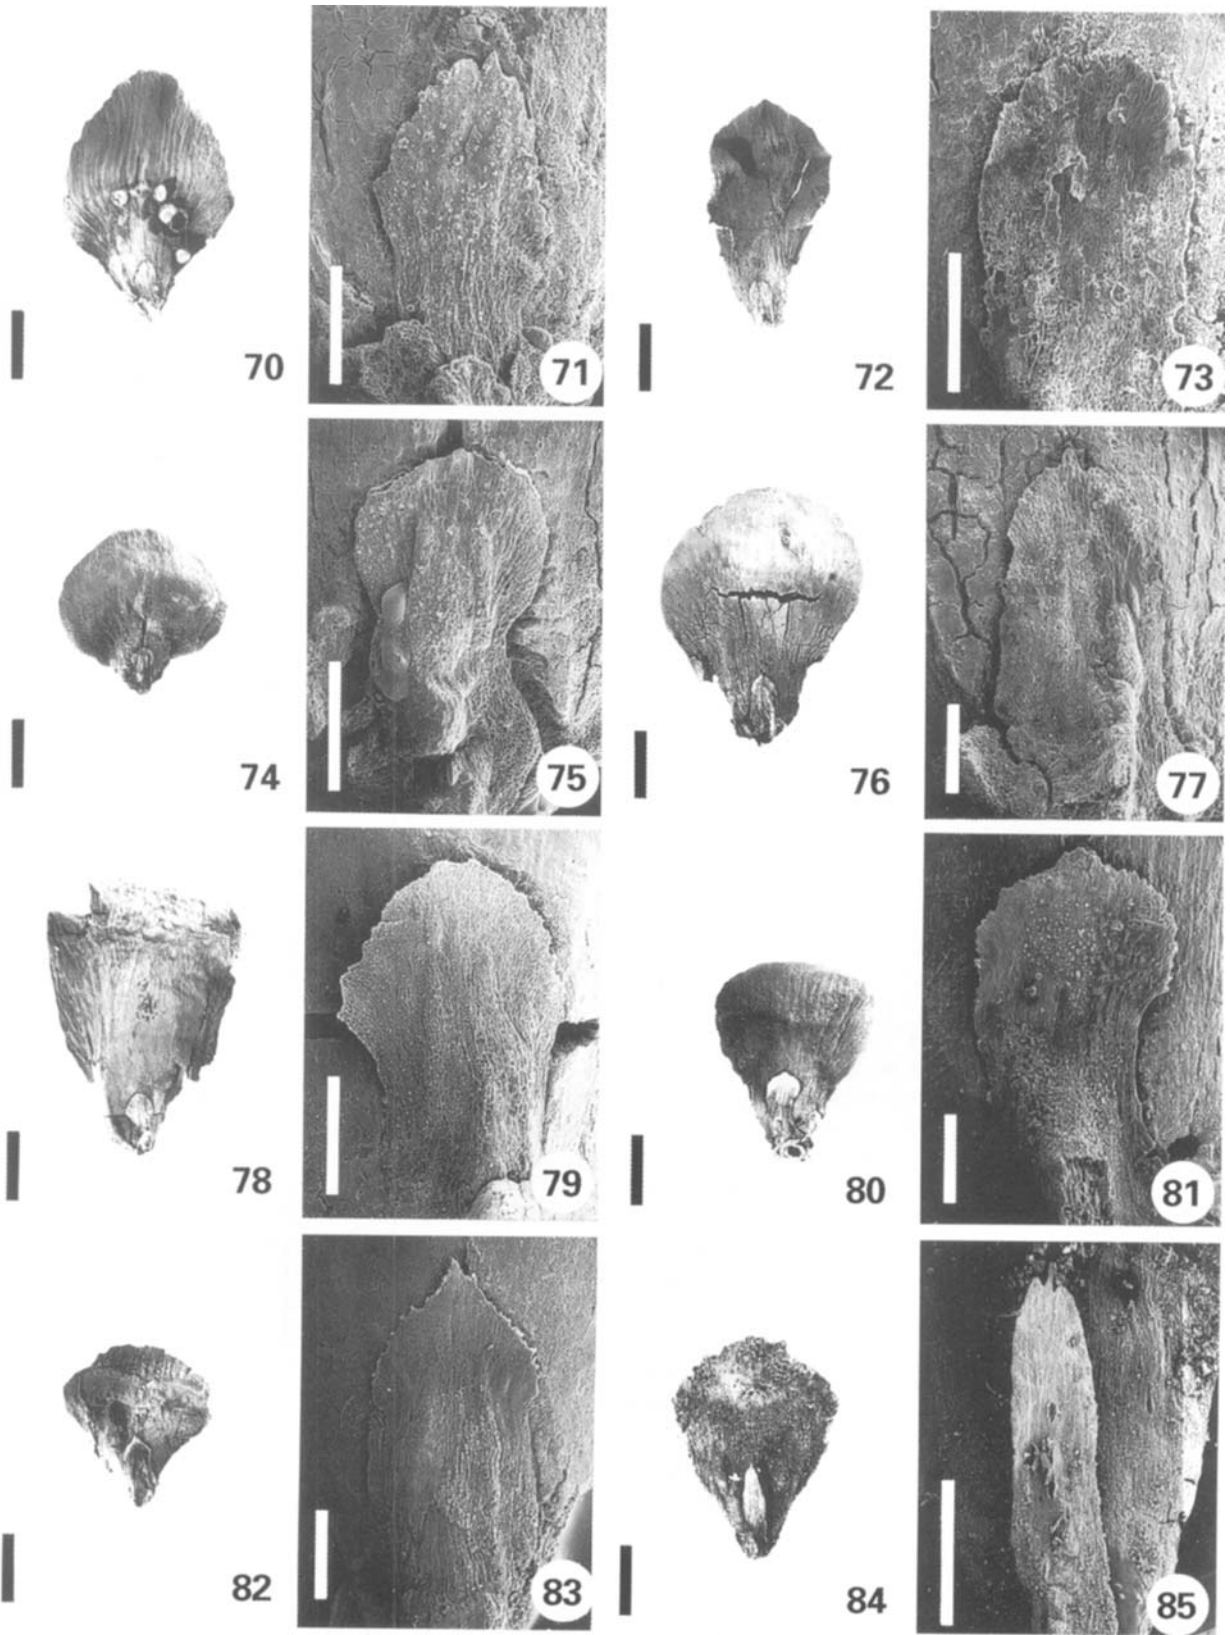



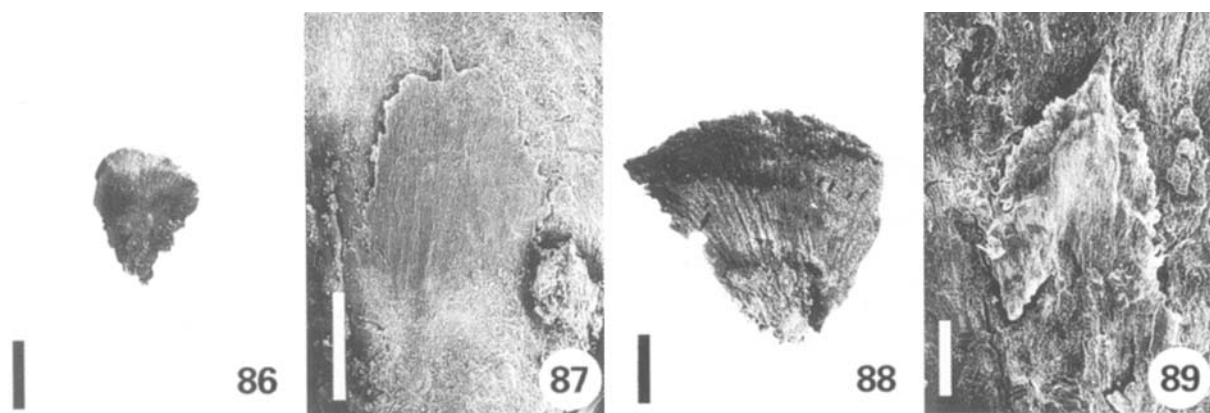

**Figures 86–88** (even numbers). Typical cone scales of species of *Picea* showing the subtending bract. Fig. 86. *Picea nanseni* (II). US220-5572. Fig. 88. *Picea palustris* (II). US588-5590. Scale bar = 5 mm. Figures 87–89 (odd numbers). SEMs of *Picea* species showing a close-up of the bract. Fig. 87. *Picea nanseni*. US-SEM 142 (US184-5573). Fig. 89. *Picea palustris*. US-SEM (US588-5590). Scale bar = 1.0 mm.

groupings. The strict and majority-rule consensus trees were more or less similar to one another and differed slightly from the UPGMA tree. The most notable difference between the cladistic and phenetic trees was the grouping of *P. breweriana* and *P. sitchensis* in the bootstrapped majority-rule consensus tree, whereas in the UPGMA tree these taxa represented separate groupings. What is particularly interesting is the manner in which the taxa were related to one another. With few exceptions, the Group I spruces were allied with other Group I spruces and the Groups II spruces clustered with other Group II spruces.

Sigurgeirsson & Szmidt (1993) also indicate low levels of *cpDNA* differentiation when compared to that seen in *Pinus* and suggested that the results either indicate (1) slower evolutionary rates than that seen in *Pinus* or (2) evolutionary radiation events that occurred later than those seen in *Pinus*. When the fossil record of *Picea* is considered (Table 1) a number of important points are noted. First, *Picea* first appears during the middle Eocene. Second, the presence of three species of *Picea* on Axel Heiberg Island indicates that species diversification appears to have occurred more-or-less simultaneously with the appearance of

the genus. Third, compared to *Pinus* which first appears during the Early Cretaceous, *c.* 130 Myr (Alvin, 1960), *Picea* is relatively young and one would not expect to find levels of *cpDNA* differentiation comparable to that seen in *Pinus*. Fourth, although *Picea* first appears during the middle Eocene, the number of species reported during the Eocene and Oligocene is small (Table 1). Large-scale evolutionary diversification of the genus did not occur until the Miocene; a time coincident with massive kilometre-scale uplift of the western Cordillera in North America and Himalayas in Asia and the formation of new montane habitats (LePage, in press).

Examination of the fossil record of *Picea* indicates that the Group I and II spruces have existed since the Eocene. Reports of fossil *Picea* seed cones are limited to about 40 reports worldwide (Table 1). In North America, imprints of *P. sookensis* LaMotte cones from the late Oligocene Sooke Formation on Vancouver Island, Canada indicate an affinity to the group of living species of *Picea* possessing thin flexible cone scales and fimbriate margins. LaMotte (1935) suggested that *P. sookensis* was most closely related to *P. sitchensis*, but this comparison is based exclusively on

**Figures 70–84** (even numbers). Typical cone scales of species of *Picea* showing the subtending bract. Fig. 70. *P. likiangensis* (I). A 13876. Fig. 72. *P. farreri* (I). A 19572. Fig. 74. *P. spinulosa* (II). A Wilson, unnumbered. Fig. 76. *P. smithiana* (II). A 10202. Fig. 78. *P. schrenkiana* (II). A Smimov, unnumbered. Fig. 80. *P. orientalis* (II). A 5442. Fig. 82. *P. omorika* (II). A Zahlmakner, unnumbered. Fig. 84. *Picea sverdrupii* (II). US237-5588. Scale bar = 5 mm. Figures 71–85 (odd numbers). SEMs of *Picea* species showing a close-up of the bract. Fig. 71. *P. likiangensis*. US-SEM 93 (A 13876). Fig. 73. *P. farreri*. US-SEM 94 (A 19572). Fig. 75. *P. spinulosa*. US-SEM 82 (A Wilson, unnumbered). Fig. 77. *P. smithiana*. US-SEM 83 (A 10202). Fig. 79. *P. schrenkiana*. US-SEM 95 (A Smimov, unnumbered). Fig. 81. *P. orientalis*. US-SEM 86 (A 5442). Fig. 83. *P. omorika*. US-SEM 108 (A Zahlmakner, unnumbered). Fig. 85. *Picea sverdrupii*. US-SEM 141 (US237-5588). Scale bar = 1.0 mm.

the external form of the cone and cone scales. Axelrod (1966, 1987) suggested that *P. lahontense* MacGinitie cones from the late Eocene Copper River Basin in Nevada are similar to cones of *P. engelmannii*, *P. likiangensis* and *P. jezoensis*, all of which are Group I spruces, while those of *P. coloradensis* Axelrod from the Oligocene Creede Flora in south-west Colorado resemble the cones of *P. pungens*. Anatomically preserved cones of *P. eichhornii* Miller from the early Oligocene Makah Formation, Olympic Peninsula, Washington also possess cone scales with thin flexible margins (Miller, 1989).

*Picea* fossils showing affinity to living species of *Picea* having thick woody cone scales and entire margins include *P. harrimanii* Knowlton, *P. breweriana*, *P. lahontense* MacGinitie, *P. wolfei* Crabtree, *P. dietertiana* Miller, *P. banksii* Hills & Ogilvie, *P. sonomensis* Axelrod and *P. mariana* (MacGinitie, 1933; Wolfe, 1964; Hills & Ogilvie, 1970; Miller, 1970; Crabtree, 1983; Axelrod, 1944a, 1987; Bennike, 1990). Many of these cones are reported to be similar to the those of *P. breweriana* (MacGinitie, 1933; Axelrod, 1944a; Wolfe, 1964; Crabtree, 1983).

In Eurasia, the cones of *P. koribai* Miki, *P. garoensis* Tanai & Suzuki, *P. snatolensis* Chelebaeva, *Picea* sp. 3, *P. mugodzhariica* Rayushkina and *P. polita* (Siebold & Zuccarini) Carrière possess cones with woody cone scales, rounded apices and entire margins (Szafer, 1947, 1954; Miki, 1957; Tanai & Suzuki, 1972; Akhmetiev, 1973; Rayushkina, 1979; Gladenkov, Sinenikova & Shantser, 1991). Cones of *P. fimbriata* Chelebaeva, *P. wollosowiczii* Sukaczew, *P. excelsa* (Lamarck) Link and *P. latisquamosa* Ludwig possess cone scales that are thin and flexible and have fimbriate margins and resemble the Group I *Picea* (Engelhardt & Kinkel, 1908; Engelhardt, 1911; Reid & Reid, 1915; Mädler, 1939; Szafer, 1947, 1954; Rayushkina, 1979; Gladenkov *et al.*, 1991).

Most of these cones are based on incomplete descriptions or occur as compression fossils and comparison with living species is based entirely on the size and shape of the cones and cone scales. While it is possible to suggest relationships between fossil and living representatives of *Picea*, the use of cone and cone-scale morphology alone provide a less than complete assessment of the characters necessary for reliable species circumscription. Sigurgeirsson & Szmidi's (1993) RFLP analysis is the only study in which the phylogeny of the genus using molecular data was examined. While their study has provided valuable insight into the relationships that appear to exist within the genus, further studies in which all species are examined and the sequencing of different regions (e.g. *rbcL* (*cpDNA*) and *ITS* (*nrDNA*)) of the genome are needed.

In addition to the lack of suitable data, understanding of the systematic relationships within the genus is further complicated because of hybridization and introgression. It is well known that where range overlaps most species of *Picea* will hybridize where opportunity arises (Dallimore & Jackson, 1948; Wright, 1955; Horton, 1959; Daubenmire, 1968; Ogilvie & Rudloff, 1968; Roche, 1969; Krüssmann, 1985; Farjon, 1990). Wright (1955) suggested that introgressive hybridization may have played an important role in the evolution of many modern species. Consequently, such problems as determining the exact number of species in south-east Asia and interpretation of systematic relationships within the genus may be related to hybridization and introgression.

It is also interesting to note that Gaussen (1966) considered small cones with hidden bracts as being ancestral and large cones with exerted bracts as being derived. However, *P. sverdrupii* and *P. palustris* possess large cones and all of the Axel Heiberg spruces possess hidden bracts which contradict Gaussen's hypothesis. In fact, exerted bracts are unknown among fossil and living species of *Picea*.

#### GENERIC-LEVEL RELATIONSHIPS

Based on the morphology of reproductive and vegetative structures, Frankis (1989) concluded that *Picea*, like *Pinus*, has no close relatives. Hart's (1987) cladistic analysis of anatomical and morphological features shows *Picea* as being the sister group to the *Cathaya* Chun & Kuang-*Pinus* clade, whereas Price, Olsen-Stojkovich & Lowenstein's (1987) immunological analysis of the family shows *Pinus* as being the sister group to *Picea*. Although their data set contained members of only eight of the eleven recognized genera of the Pinaceae (*sensu* Farjon, 1984, 1990), Xiao-Quan *et al.* (1997) provide two phylogenetic topologies for the Pinaceae using RFLP analysis of *cpDNA*. One (Wagner tree generated by the Branch and Bound option of PAUP 3.1.1) presents *Picea* as being the sister group to a clade containing *Cedrus* Trew, *Pinus*, *Cathaya*, *Larix*, and *Pseudotsuga* Carrière, with *Keteleeria* Carrière being the sister group to the previous clade (including *Picea*) and *Abies* being the sister group to the other seven genera used in the analysis. The second (neighbour joining), indicates that *Picea* is the sister group to *Cedrus*, *Abies*, and *Keteleeria*, with *Pinus*, *Cathaya*, *Pseudotsuga*, and *Larix* forming a separate clade. The RFLP analysis of the *cpDNA* of Tsumura *et al.* (1995) places *Cedrus* as the sister group to *Picea* within its own clade. Clearly the ancestry of *Picea* remains unresolved and illustrates the need for further detailed anatomical, morphological and molecular analyses. Although the ancestry of *Picea* remains unknown, Miller (1988, 1989) has suggested

that the genus probably had its roots in the late Cretaceous/early Tertiary and is most likely related to taxa included in the extinct *Pityostrobus* Nathorst *ex* Dutt and *Pseudoaraucaria* Fliche complexes.

The fossil spruces from Axel Heiberg Island reliably extend the fossil record of *Picea* to the middle Eocene and provide the earliest evidence for the lineage possessing thick and woody cone scales with entire margins. The presence of three species on Axel Heiberg Island also indicates that diversification of the genus occurred early in the evolution of the group and that it was well underway, at least in the Canadian High Arctic during the early Tertiary.

#### ACKNOWLEDGEMENTS

Thanks are due to the many who contributed in various ways to this study, including J.F. Basinger, R.L. Christie, J.E. Francis, J.D. Gardner, L.V. Hills, D.J. McIntyre, E.E. McIver, C. Nelson, R. Reid, B.D. Ricketts, L. Savard, S.E. Scheckler, N. Tremblay and K. Wobeser for assistance in the field; R.L. Angelo and M. Canoso (Arnold Arboretum), J.C. Solomon and D.R. Brunner (Missouri Botanic Garden), V.L. Harms and P.A. Ryan (Fraser Herbarium), R. Bayer (University of Alberta Herbarium) and G.F. Russell and M. Knowles (United States National Herbarium) for herbarium specimens; K. Aulenback (Tyrrell Museum of Paleontology) and S.L. Wing (Smithsonian Institution) for providing fossil specimens for examination; C.J. Williams, D. Liptzin, H.W. Pfefferkorn and an anonymous reviewer for comments and suggestions that improved the manuscript; and Y. Matsuura, K. Saiki, T. Sweda, H. Takeuchi and S. Kojima for providing fresh material of *Picea*. Financial support for this work was provided to the author in part by Natural Sciences and Engineering Research Council of Canada (PGS and PDF 111641; Northern Scientific Training Program (NSTP) of the Department of Indian and Northern Development; Polar Continental Shelf Project (PCSP) of Energy, Mines, and Resources Canada; University of Saskatchewan graduate scholarship; the University of Pennsylvania Mellon Geobiology Fund; and the Andrew W. Mellon Foundation. Polar Continental Shelf Project Contribution No. 02799.

#### REFERENCES

- Akhmetiev MA. 1973.** Sikhote-Alin Miocene flora (Botchi River). *Academy of Sciences of the USSR, Transactions* **247**: 1–124 (in Russian).
- Alvin KL. 1960.** Further conifers of the Pinaceae from the Wealden Formation of Belgium. *Institut Royal des Sciences Naturelles de Belgique, Mémoires* **146**: 1–39.
- Axelrod DI. 1944a.** The Sonoma flora (California). *Carnegie Institution of Washington, Publication* **553**: 167–206.

- Axelrod DI. 1944b.** The Alvord Creek flora. *Carnegie Institution of Washington, Publication* **553**: 225–262.
- Axelrod DI. 1956.** Mio-Pliocene floras from west-central Nevada. *University of California Publications in Geological Sciences* **33**: 1–316.
- Axelrod DI. 1964.** The Miocene Trapper Creek flora of southern Idaho. *University of California Publications in Geological Sciences* **51**: 1–48.
- Axelrod DI. 1966.** The Eocene Copper Basin flora of north-eastern Nevada. *University of California Publications in Geological Sciences* **59**: 1–86.
- Axelrod DI. 1985.** Miocene floras from the Middlegate Basin, west-central Nevada. *University of California Publications in Geological Sciences* **129**: 1–279.
- Axelrod DI. 1987.** The late Oligocene Creede flora, Colorado. *University of California Publications in Geological Sciences* **130**: 1–235.
- Axelrod DI. 1991.** The early Miocene Buffalo Canyon flora of western Nevada. *University of California Publications in Geological Sciences* **135**: 1–76.
- Axelrod DI. 1992.** The middle Miocene Pyramid flora of western Nevada. *University of California Publications in Geological Sciences* **137**: 1–50.
- Axelrod DI. 1995.** The Miocene Purple Mountain flora of western Nevada. *University of California Publications in Geological Sciences* **139**: 1–62.
- Axelrod DI. 1998.** The Eocene Thunder Mountain flora of central Idaho. *University of California Publications in Geological Sciences* **142**: 1–61.
- Basinger JF. 1991.** The fossil forests of the Buchanan Lake Formation (early Tertiary), Axel Heiberg Island, Canadian High Arctic: Preliminary floristics and paleoclimate. *Geological Survey of Canada, Bulletin* **403**: 39–65.
- Bassler RS. 1953.** Bryozoa. In: Moore RC, ed. *Treatise on invertebrate paleontology. Part G.* Lawrence: Geological Society of America and University of Kansas Press, 1–253.
- Beck GF. 1945a.** Tertiary coniferous woods of western North America. *Northwest Science* **19**: 67–69.
- Beck GF. 1945b.** Ancient forest trees of the sagebrush area in central Washington. *Journal of Forestry* **43**: 334–338.
- Becker HF. 1961.** Oligocene plants from the upper Ruby River Basin, southwestern Montana. *Geological Society of America, Memoir* **82**: 1–127.
- Becker HF. 1969.** Fossil plants from the Oligocene Beaverhead Basins in southwestern Montana. *Palaeontographica Abteilung B. Paläophytologie* **127**: 1–142.
- Bennike O. 1990.** The Kap København Formation: stratigraphy and paleobotany of a Plio-Pleistocene sequence in Peary Land, North Greenland. *Meddelelser Om Grønland Geoscience* **23**: 1–85.
- Bobrov EG. 1970.** History and systematics of the genus *Picea* A. Dietr. *Novitates Systematicae Plantarum Vascularium* **7**: 5–39.
- Brown RW. 1937.** Additions to some fossil floras of the western United States. *United States Geological Survey, Professional Paper* **186-J**: 163–206.
- Bustin RM. 1982.** Beaufort Formation, eastern Axel Heiberg Island, Canadian Arctic Archipelago. *Bulletin of Canadian Petroleum Geology* **30**: 140–149.
- Bůžek Č, Kvaček Z, Holý F. 1985.** Late Pliocene palaeoenvironment and correlation of the Vildštejn floristic complex within central Europe. *Rozprawy Československé Akademie Věd* **95**: 1–72.

- Chaney RW, Axelrod DI. 1959. Miocene floras of the Columbia Plateau. Part II, systematic considerations. *Carnegie Institution of Washington, Publication* 617: 135–229.
- Crabtree DR. 1983. *Picea wolfei*, a new species of petrified cone from the Miocene of northwestern Nevada. *American Journal of Botany* 70: 1356–1364.
- Dallimore W, Jackson AB. 1948. A handbook of Coniferae including Ginkgoaceae. 3rd ed. London: Edward Arnold.
- Daubenmire R. 1968. Some geographic variations in *Picea sitchensis* and their ecologic interpretation. *Canadian Journal of Botany* 46: 787–798.
- Dilcher DL. 1974. Approaches to the identification of angiosperm leaf remains. *Botanical Review* 40: 1–157.
- Dorf E. 1938. A late Tertiary flora from southwestern Idaho. *Carnegie Institution of Washington, Publication* 476-II: 73–124.
- Dorofeev PI. 1963. *The Tertiary floras of western Siberia*. Moscow: Nauka (in Russian).
- Dorofeev PI. 1969. *The Miocene flora of the Mammoth Mountain on the Aldan River*. Leningrad: Nauka (in Russian).
- Dorofeev PI. 1970. *The Tertiary flora of the Urals*. Leningrad: Nauka (in Russian).
- Dorofeev PI. 1972. The Tertiary fossil flora of the Omoloi Basin. In: Chrshanovsky VG, Lavrenko EM, Linczevsky IA, Nikitin VV, Vassilchenko IT, Zakirov KZ, eds. *The history of the flora and vegetation of Eurasia*. Leningrad: Nauka, 41–112 (in Russian).
- Dorofeev PI. 1988. *Miocene flora of Tambov Province*. Leningrad: Nauka (in Russian).
- Eberle JJ, Storer JE. 1999. Northernmost record of brontotheres, Axel Heiberg Island, Canada – implications for age of the Buchanan Lake Formation and brontothere paleobiology. *Journal of Paleontology* 73: 979–983.
- Engelhardt H. 1911. Über tertiäre Pflanzenreste von Flörshheim am Main. *Abhandlungen Herausgegeben Senckenbergischen Naturforschenden Gesellschaft* 29: 307–406.
- Engelhardt H, Kinkelin F. 1908. Oberpliozäne Flora und Fauna des Untermaintales, insbesondere des Frankfurter Klärbeckens. *Abhandlungen Senckenbergischen Naturforschenden Gesellschaft* 29: 151–306.
- Farjon A. 1984. *Pines: drawings and descriptions of the genus Pinus*. Leiden: E.J. Brill/Dr. W. Backhuys.
- Farjon A. 1990. Pinaceae: drawings and descriptions of the genera *Abies*, *Cedrus*, *Pseudolarix*, *Keteleeria*, *Nothotsuga*, *Tsuga*, *Cathaya*, *Pseudotsuga*, *Larix*, and *Picea*. *Regnum Vegetabile* 121: 1–330.
- Florin R. 1931. Untersuchungen zur Stammesgeschichte der Coniferales und Cordaitales. *Kungliga Svenska Vetenskaps-Akademiens Handlingar* 10: 1–588.
- Fotyánova LI. 1988. *Flora of the far east from the Paleogene/Neogene boundary (on the example of Sakhalin and Kamchatka)*. Moscow: Nauka (in Russian).
- Frankis MP. 1989. Generic inter-relationships in Pinaceae. *Notes of the Royal Botanic Garden, Edinburgh* 45: 527–548.
- Gaussen H. 1966. Les gymnospermes actuelles et fossiles. *Travaux du Laboratoire Forestiers de Toulouse* 2: 481–486.
- Givulescu R. 1979. Paläobotanische Untersuchungen im Pflanzenfundort Chiuzbaia (Kreis Maramures-Rumänien). *Institutul de Geologie si Geofizica, Memorii* 28: 65–150 (in Romanian).
- Givulescu R. 1990. *Fossil flora of higher Miocene in Chiuzbaia (Maramures county)*. Bucharest: Romanian Academy (in Romanian).
- Gladenkov YB, Sinelnikova VN, Shantser AE. 1991. The Eocene of western Kamchatka. *Academy of Sciences of the USSR, Transactions* 467: 1–184 (in Russian).
- Hart JA. 1987. A cladistic analysis of conifers: preliminary results. *Journal of the Arnold Arboretum* 68: 269–307.
- Hickey LJ. 1973. Classification of the architecture of dicotyledonous leaves. *American Journal of Botany* 60: 17–33.
- Hickey LJ. 1977. Stratigraphy and paleobotany of the Golden Valley Formation (early Tertiary) of western North Dakota. *Geological Society of America, Memoir* 150: 1–183.
- Hills LV, Bustin RM. 1976. *Picea banksii* Hills & Ogilvie from Axel Heiberg Island, District of Franklin. *Geological Survey of Canada, Paper* 76-1B: 61–63.
- Hills LV, Ogilvie RT. 1970. *Picea banksii* n. sp. Beaufort Formation (Tertiary), northwestern Banks Island, Arctic Canada. *Canadian Journal of Botany* 48: 457–464.
- Hollick A. 1936. The Tertiary floras of Alaska. *United States Geological Survey, Professional Paper* 182: 1–185.
- Horton KW. 1959. Characteristics of subalpine spruce in Alberta. *Canada Department of Northern Affairs and National Resources, Forestry Branch, Forest Research Division, Technical Note* 76: 1–20.
- Huzioka K. 1963. The Utto flora of northern Honshu. Tertiary Floras of Japan, Miocene Floras. *The Collaborating Association to Commemorate the 80th Anniversary of the Geological Survey of Japan* 1: 153–216.
- Huzioka K, Takahasi E. 1970. The Eocene coal flora of the Ube coal-field, southwest Honshu, Japan. *Journal of the Mining College, Akita University Series A, Mining Geology* 4: 1–88.
- Ishida S. 1970. The Noroshi flora of Noto Peninsula, central Japan. *Memoirs of the Faculty of Science, Kyoto University, Series of Geology and Mineralogy* 37: 1–112.
- Kent AH. 1900. *Veitch's manual of the Coniferae*. Chelsea: Veitch.
- Knowlton FH. 1898. The fossil plants of the Payette Formation. *United States Geological Survey, 18th Annual Report* 3: 721–744.
- Knowlton FH. 1904. Fossil plants from Kukak Bay. *Harriman Alaska Expedition* 4: 149–162.
- Krüssmann G. 1985. *Manual of cultivated conifers*. Portland: Timber Press.
- Lacassagne M. 1934. Étude morphologique, anatomique et systématique du genre *Picea*. *Travaux du Laboratoire Forestiers de Toulouse* 2: 1–291.
- LaMotte RS. 1935. An upper Oligocene florule from Vancouver Island. *Carnegie Institute of Washington, Publication* 455: 49–56.
- LePage BA. 1991. The use of the bract as a diagnostic feature in the taxonomy of the Pinaceae. *American Journal of Botany* 78: 117–118.
- LePage BA. in press. The evolution, biogeography, and paleoecology of selected genera of the Pinaceae. *Acta Horticulturae*.
- LePage BA, Basinger JF. 1991. A new species of *Larix* (Pinaceae) from the early Tertiary of Axel Heiberg Island, Arctic Canada. *Review of Palaeobotany and Palynology* 70: 89–111.
- LePage BA, Basinger JF. 1995. Evolutionary history of the genus *Pseudolarix* Gordon (Pinaceae). *International Journal of Plant Sciences* 156: 910–950.
- Liu T. 1982. A new proposal for the classification of the genus *Picea*. *Acta Phytotaxonomica et Geobotanica* 33: 227–245.

- Liu TS. 1971. *A monograph of the genus Abies*. Taipei: National Taiwan University.
- MacGinitie HD. 1933. The Trout Creek Flora of south-eastern Oregon. *Carnegie Institution of Washington, Publication* 416-II: 21–68.
- MacGinitie HD. 1953. Fossil plants of the Florissant Beds, Colorado. *Carnegie Institution of Washington, Publication* 599: 1–188.
- McIntyre DJ. 1991. Pollen and spore flora of an Eocene High Arctic forest, eastern Axel Heiberg Island, N.W.T. *Geological Survey of Canada, Bulletin* 403: 83–97.
- Mädler K. 1939. Die pliozäne Flora von Frankfurt am Main. *Abhandlungen der Senckenbergischen Naturforschenden Gesellschaft* 446: 1–202.
- Mai DH. 1987. Neue Arten nach Früchten und Samen aus dem Tertiär von Nordwetsachsen und der Lausitz. *Feddes Repertorium* 98: 105–126.
- Mai DH, Walther H. 1991. Die oligozänen und untermiozänen Floren NW-Sachsens und des Bitterfelder Raumes. *Abhandlungen des Staatlichen Museums für Mineralogie und Geologie zu Dresden* 38: 1–230.
- Mason HL. 1927. Fossil records of some west American conifers. *Carnegie Institution of Washington, Publication* 346-V: 139–158.
- Matsuo H. 1963. The Notonakajima flora of Noto Peninsula. Tertiary Floras of Japan, Miocene Floras. *The Collaborating Association to Commemorate the 80th Anniversary of the Geological Survey of Japan* 1: 219–258.
- Mayr H. 1890. *Monographie der Abietineen des Japanischen Reiches*. München: M. Rieger'sche Universitäts-Buchhandlung.
- Metcalfe CR, Chalk L. 1979. *Anatomy of dicotyledons*, 2nd ed. Vol. 1. Oxford: Clarendon.
- Miki S. 1941. On the change of flora of eastern Asia since Tertiary period (1) The clay or lignite beds flora in Japan with special reference to the *Pinus trifolia* beds in central Hondo. *Japanese Journal of Botany* 11: 237–303.
- Miki S. 1948. Floral remains in Kinki and adjacent districts since the Pliocene with description of 8 new species. *Mineralogy and Geology* 2: 105–144 (in Japanese).
- Miki S. 1957. Pinaceae of Japan, with special reference to its remains. *Journal of the Institute of Polytechnics, Osaka City University, Series D, Biology* 8: 221–272.
- Miller CN Jr. 1970. *Picea dietteriana*, a new species of petrified cones from the Oligocene of western Montana. *American Journal of Botany* 57: 579–585.
- Miller CN Jr. 1988. The origin of modern conifer families. In: Beck CB, ed. *Origin and evolution of gymnosperms*. New York: Columbia University Press, 448–486.
- Miller CN Jr. 1989. A new species of *Picea* based on silicified seed cones from the Oligocene of Washington. *American Journal of Botany* 76: 747–754.
- Ohsawa T. 1994. Anatomy and relationships of petrified seed cones of the Cupressaceae, Taxodiaceae, and Sciadopityaceae. *Journal of Plant Research* 107: 503–512.
- Ogilvie RT, Rudloff E von. 1968. Chemosystematic studies in the genus *Picea* (Pinaceae). IV. The introgression of white and engelmann spruces as found along the Bow River. *Canadian Journal of Botany* 46: 901–908.
- Oliver E. 1936. A Miocene flora from the Blue Mountains, Oregon. *Carnegie Institution of Washington, Publication* 455-I: 1–27.
- Onoé T. 1989. Palaeoenvironmental analysis based on the Pleistocene Shibara flora in the Shiobara volcanic basin, central Japan. *Geological Survey of Japan* 269: 1–207.
- Ozaki K. 1991. Late Miocene and Pliocene floras in central Honshu, Japan. *Bulletin of the Kanagawa Prefectural Museum Natural Science, Special Issue*: 1–244.
- Page CN, Rushforth KD. 1980. *Picea farreri*, a new temperate conifer from upper Burma. *Notes of the Royal Botanic Garden, Edinburgh* 38: 129–136.
- Palibin IV. 1934. Paleobotanical symposium; materials on the pre-glacial flora of Kamchatka. *Transactions of the Oil and Geological Institute* 1: 46–56 (in Russian).
- Pardé L. 1911. Conifères, essais de tableaux dichotomiques pour la détermination des espèces. *Bulletin de la Société Dendrologique de France*: 7–12.
- Pastiels A. 1948. Contribution à l'étude des microfossiles de l'Éocène Belge. *Mémoires du Musée d'Histoire Naturelle de Belgique* 109: 1–77.
- Patschke W. 1913. Über die extratropischen ostasiatischen Coniferen und ihre Bedeutung für die pflanzengeographische Gliederung Ostasiens. *Botanische Jahrbücher* 48: 626–776.
- Penhallow DP. 1906. Determinations of fossil plants from various localities in British Columbia and the Northwest territories. *Geological Survey of Canada, Annual Report* 16: 389A–392A.
- Penhallow DP. 1907. A report on fossil plants from the International Boundary Survey for 1903–1905, collected by Dr. R. A. Daly. *Proceedings and Transactions of the Royal Society of Canada* 1: 287–351.
- Penhallow DP. 1908. Report on Tertiary plants of British Columbia collected by Lawrence M. Lambe in 1906 together with previously recorded Tertiary floras. *Canada Department of Mines, Geological Survey Branch* 1013: 1–167.
- Price RA, Olsen-Stojkovich J, Lowenstein JM. 1987. Relationships among the genera of Pinaceae: immunological comparison. *Systematic Botany* 12: 91–97.
- Rayushkina GS. 1979. *The Oligocene flora from the Mugodzhur and Juzhno-go mountains*. Alma-Ata: Nauka (in Russian).
- Reid C, Reid EM. 1915. The Pliocene floras of the Dutch-Prussian border. *Mededeelingen van de Rijksopsporing van Delfstoffen* 6: 1–178.
- Ricketts BD. 1986. New formations in the Eureka Sound Group, Canadian Arctic Islands. *Geological Survey of Canada, Paper* 86-1B: 363–374.
- Ricketts BD. 1987. Princess Margaret Arch: a re-evaluation of an element of the Eureka Orogen, Axel Heiberg Island, Arctic Archipelago. *Canadian Journal of Earth Sciences* 24: 2499–2505.
- Ricketts BD. 1991. The influence of sedimentation and Eureka tectonism on the fossil forest succession, eastern Axel Heiberg Island. *Geological Survey of Canada, Bulletin* 403: 1–27.
- Ricketts BD. 1994. Basin analysis, Eureka Sound Group, Axel Heiberg and Ellesmere islands, Canadian Arctic Archipelago. *Geological Survey of Canada, Memoir* 439: 1–119.
- Ricketts BD, McIntyre DJ. 1986. The Eureka Sound Group of eastern Axel Heiberg Island: new data on the Eureka Orogeny. *Geological Survey of Canada, Paper* 86-1B: 405–410.
- Roche L. 1969. A genecological study of the genus *Picea* in British Columbia. *New Phytologist* 68: 505–554.

- Rushforth KD. 1987.** *Gazetteer on conifers*. New York: Facts on File Publications.
- Schmidt PA. 1988.** Taxonomisch-nomenklatorische Notiz zur Gattung *Picea* A. Dietr. *Hausknechtia* **4**: 37–38.
- Schmidt PA. 1989.** Beitrag zur Systematik und Evolution der Gattung *Picea* A. Dietr. *Flora* **182**: 435–461.
- Schmidt-Vogt H. 1977.** *Die Fichte*. Hamburg: Verlag Paul Parey.
- Scoggan HJ. 1978.** *The flora of Canada*. Ottawa: National Museums of Natural Sciences, National Museums of Canada.
- Sigurgeirsson A, Szmidt AE. 1993.** Phylogenetic and biogeographic implications of chloroplast DNA variation in *Picea*. *Nordic Journal of Botany* **13**: 233–246.
- Silba J. 1984.** An international census of the Coniferae, I. *Phytologia Memoirs* **7**: 43–47.
- Silba J. 1986.** Encyclopedia Coniferae. *Phytologia Memoirs* **8**: 1–217.
- Slijper EJ. 1932.** Über Pliozäne Hölzer aus dem Ton von Reuver (Limburg, Holland). *Recueil des Travaux Botanique Néerlandais* **22**: 18–35.
- Smith HV. 1938.** Notes on fossil plants from Hog Creek in southwestern Idaho. *Michigan Academy of Sciences, Paper* **23**: 223–231.
- Smith HV. 1941.** A Miocene flora from Thorn Creek, Idaho. *American Midland Naturalist* **25**: 473–522.
- Spicer RA, Greer AG. 1986.** Plant taphonomy in fluvial and lacustrine systems. *University of Tennessee Department of Geological Sciences Studies in Geology* **15**: 10–26.
- Szafer W. 1947.** The Pliocene flora of Krościenko in Poland. *Polska Akademia Umiejetnosci, Rozprawy Wydziału Matematyczno-Przyrodniczego* **72**: 1–213 (in Polish).
- Szafer W. 1954.** Pliocene flora from the vicinity of Czorsztyn (west Carpathians) and its relationship to the Pleistocene. *Instytut Geologiczny* **11**: 1–238 (in Polish).
- Tanai T. 1952.** Des fossiles végétaux dans le Bassin Houiller de Nishitagawa, Préfecture de Yamagata, Japon. *Japanese Journal of Geology and Geography, Transactions* **22**: 119–135.
- Tanai T. 1955.** Illustrated catalogue of Tertiary plants in Japanese coal fields – I. early and middle Miocene floras. *Geological Survey of Japan* **163**: 1–16 (in Japanese).
- Tanai T. 1961.** Neogene floral change in Japan. *Journal of the Faculty of Science, Hokkaido University, Series 4. Geology and Mineralogy* **11**: 119–398.
- Tanai T, Onoé T. 1959.** A Miocene flora from the northern part of the Joban Coal Field, Japan. *Bulletin of the Geological Survey of Japan* **10**: 261–286.
- Tanai T, Onoé T. 1961.** A Mio-Pliocene flora from the Ningyotoge area on the border between Tottori and Okayama prefectures, Japan. *Geological Survey of Japan* **187**: 1–63.
- Tanai T, Suzuki N. 1963.** Miocene floras of southwestern Hokkaido, Japan. Tertiary Floras of Japan, Miocene Floras. *The Collaborating Association to Commemorate the 80th Anniversary of the Geological Survey of Japan* **1**: 9–149.
- Tanai T, Suzuki N. 1965.** Late Tertiary floras from north-eastern Hokkaido, Japan. *Palaeontological Society of Japan, Special Papers* **10**: 1–117.
- Tanai T, Suzuki N. 1972.** Additions to the Miocene floras of southwestern Hokkaido, Japan. *Journal of the Faculty of Science, Hokkaido University, Series IV. Geology and Mineralogy* **15**: 281–359.
- Tsumura Y, Yoshimura K, Tomaru N, Ohba K. 1995.** Molecular phylogeny of conifers using RFLP analysis of PCR-amplified specific chloroplast genes. *Theoretical and Applied Genetics* **91**: 1222–1236.
- Wehr WC, Schorn HE. 1992.** Current research on Eocene conifers at Republic, Washington. *Washington Geology* **20**: 20–23.
- Willkomm M. 1887.** *Forstliche Flora von Deutschland und Oesterrich*. Leipzig: C.F. Winter'sche Berlagshandlung.
- Wilson LR, Webster RM. 1946.** Plant microfossils from a Fort Union Coal of Montana. *American Journal of Botany* **33**: 271–278.
- Wodehouse RP. 1933.** Tertiary pollen, II. The oil shales of the Eocene Green River Formation. *Bulletin of the Torrey Botanical Club* **60**: 479–524.
- Wolfe JA. 1964.** Miocene floras from Fingerrock Wash southwestern Nevada. *United States Geological Survey, Professional Paper* **454-N**: 1–36.
- Wolfe JA, Schorn HE. 1990.** Taxonomic revision of the Spermatoopsida of the Oligocene Creede Flora, southern Colorado. *United States Geological Survey, Bulletin* **1923**: 1–40.
- Wright JW. 1955.** Species crossability in spruce in relation to distribution and taxonomy. *Forestry* **1**: 319–349.
- Xiao-Quan W, Ying H, Zheng-Rong D, De-Yuan H. 1997.** Phylogeny of the Pinaceae evidenced by molecular biology. *Acta Phytotaxonomica Sinica* **35**: 97–106 (in Chinese with English abstract).
- Yabe H, Endô S. 1939.** Floral change during the Cenozoic Era in the Japanese islands. *Proceedings of the 6th Pacific Science Congress, Berkeley, California* **3**: 631–642.

## APPENDIX 1

Extant herbarium specimens used for comparison during this study were provided by the Arnold Arboretum, Harvard University Herbarium, Cambridge, Massachusetts, U.S.A. (A); British Museum (Natural History), London, England (BM); Missouri Botanical Garden, St. Louis, Missouri, U.S.A. (MO); Fraser Herbarium, University of Saskatchewan, Saskatoon, Saskatchewan, Canada (SASK); University of Alberta Herbarium, Edmonton, Alberta, Canada (ALTA); United States National Herbarium, Smithsonian Institution, Washington, D.C., U.S.A. (US).

Living specimens of *Picea* were collected from Heritage Lake (53°56'N, 105°09'W), Saskatchewan, Canada (*P. mariana* and *P. glauca*); Elbow Summit (49°42'N, 114°59'W), Alberta, Canada (*P. engelmannii*); Powder Face Trail (50°55'N, 114°55'W), Alberta, Canada (*P. engelmannii*); Bedgebury Pinetum, Bedgebury, Kent, England (*P. abies*); The Royal Botanic Gardens, Kew, England (*P. abies*); near Cerin, France (*P. abies*); Kiyozumi-cho, Misaka (43°15'N, 141°54'E), Hokkaido, Japan (*P. jezoensis*); Nayoro Forest Tree Breeding Station, Hokkaido University, Nayoro (44°39'N, 142°25'E), Hokkaido, Japan (*P. glehnii*); Forestry and Forest Product Research Institute, Hokkaido Research Center, Sapporo, Hokkaido, Japan (*P. jezoensis*, *P. jezoensis* var. *hondoensis*, *P. glehnii* and *P. koyamae*). These specimens have been deposited in the Fraser Herbarium (SASK).

## Specimens examined

*Picea abies* (L.) Karsten: US: 481520, 272364; A: Ronniger, Stefanoff & Georgioff, Lindquist, Johnsson;

- MO: 875923, 875924, 875925, 1635470, 1635469; BM: 38305, 38296.
- Picea alcoquiana* (Veitch ex Lindley) Carrière: US: 2498207, 764406; A: 7861, 6064, 1959, 7777, unnumbered.
- Picea asperata* Masters: US: 776060, 1331967, 1245488, 1332066, 776014, 1331996, 775988, 775987, 320, 4066; A: 14815, 14444, 13666, 8050, 4066; BM: 38311.
- Picea brachytyla* (Franchet) Pritzl: US: 776069, 775996, 1345665, 1330232, 2052, 775997, 1330155, 2072, 1330192, 2076; A: 3411, 9549, 4470, 2052, 2052, 11705, 9108, 2075, 2076, 22902.
- Picea breweriana* S. Watson: MO: 1243441, 1178204, 984840, 1635409.
- Picea chihuahuana* Martínez: MO: 1225972.
- Picea engelmannii* Parry ex Engelm.: MO: 2505160 (Type specimen), 1505159, 3539164, 2505868, 2505844, 2505850, 1216982, 2505833, 922704, 2505161, 2505155, 2505158, 3574111; SASK: 94398.
- Picea farreri* Page & Rushforth: A: 19572.
- Picea glauca* (Moench) Voss: SASK: 879, 880, 882, 884, 886, 887, 888, 890, 891, 893, 894, 895, 899, 900, 901, 904, 905, 906, 907, 21017, 21083, 27720, 28838, 28840, 28841, 28842, 38283, 40301, 40562, 40564, 57876, 61069, 61070, 65195, 67421, 70182, 70183, 76637, 78400, 78405, 79057, 80220, 90367, 94462, 95556, 95557, 95570, 95623, 95628, 95634, 96057, 118259.
- Picea glehnii* (Fr. Schmidt) Masters: US: 764405, 764404; A: 7404, Abo 1884, 6652; BM: 38313; SASK: 118258.
- Picea jezoensis* (Siebold & Zuccarini) Carrière: US: 764188, 778297, 1274386, 7520, 9245; A: 9148, 725, 7772, Tokubuchi 1889, 7317, 6062; MO: 1639467, 865739, 865725, 2782001; BM: 38294, 38295, 38304, 38299, 38315; SASK: 118257.
- Picea koraiensis* Nakai: A: 334; MO: 1639472.
- Picea koyamae* Shiraiwa: US: 74385, 1274457, 764403, 8963; A: 8963, 7523, 7523; MO: 807113; BM: 38314.
- Picea likiangensis* (Franchet) Pritzl: US: 1510899, 1510201, 1330157, 1334811, 1334139, 1674231, 776070, 1674237, 776054, 599459, 775986, 775990, 775985, 1674234, 2060, 2056, 2059; A: 17444, 4420, 1779, 13876, 2064, 2066, 7710; MO: 1030376, 1619805, 1619706; BM: 38292, 38301, 38302, 38312, 38310, 38309.
- Picea mariana* (Miller) Britton, Sterns & Poggenberg: SASK: 909, 910, 911, 912, 913, 917, 918, 920, 921, 925, 926, 927, 928, 27646, 27703, 29072, 29074, 29997, 32429, 40323, 40559, 44367, 44368, 44369, 45374, 45375, 45968, 47787, 51555, 51562, 52088, 52090, 52091, 52092, 52093, 52095, 52096, 55891, 57360, 60644, 60645, 60647, 62126, 62131, 62274, 62275, 62279, 62483, 66118, 67648, 70701, 76631, 76632, 78137, 78154, 78407, 78408, 78411, 78412, 79059, 79728, 80261, 80423, 81282, 81346, 81450, 90528, 93844, 93859, 95700, 118260.
- Picea maximowiczii* Regel ex Masters: US: 2501381; A: Fudgiyama 1864, 7526, Azusayama 3/10 1959; MO: 1635499.
- Picea meyeri* Rehder & Wilson: A: 813.
- Picea morrisonicola* Hayata: US: 1372613, 1274489, 10901; A: 1978, 20676, unnumbered; MO: 1627050; BM: 38317, 38316.
- Picea neoveitchii* Masters: US: 2054; A: 2054, 61554.
- Picea obovata* Ledebour: A: 281; BM: 38298.
- Picea omorika* (Pančić) Purkyne: US: 3029029, 1576572; A: Pančić, Zahlbmöhner.
- Picea orientalis* (L.) Link: A: Gay 1884, Schneider, 5542; BM: 38290, 38291, 38306.
- Picea pungens* Engelm.: MO: 1635434, 2505866; SASK: 17570, 19591.
- Picea purpurea* Masters: US: 1245988, 776011, 1331827, 1703092, 1245818, 1245817, 1331843, 4059, 4062; A: 4059, 804, 13427, 13344, 7955; BM: 38318.
- Picea retroflexa* Masters: BM: 38307.
- Picea rubens* Sargent: ALTA: 25789.
- Picea schrenkiana* Fisher & Meyer: US: 790, 813, 806; A: 81828, Litnow, unnumbered, Transchel, 19728.
- Picea sitchensis* (Bongard) Carrière: MO: 2818, 2489, unnumbered, 5015, 1231478, 1635404, 1635402; SASK: 37436, 88050, 94474.
- Picea smithiana* (Wallich) Boissier: US: 2242336; A: 10202.
- Picea spinulosa* (Griffith) Henry: US: 2394904; A: 16675, 5349, Wilson, 3890; BM: 38297, 38303.
- Picea torano* (Siebold ex K. Koch) Koehne: US: 1311907, 2496758; A: Wilson 1914, 1862, 2580.
- Picea wilsonii* Masters: US: 2053, 1529366, 1345667, 1332064, 1332007, 2053; A: 14975, 2114, 8051, 1823, 2053; MO: 3754892, 2929264; BM: 38308.

## APPENDIX 2

Fossil specimens used for comparison during this study were provided by the Smithsonian Institution, Department of Paleobiology, Washington, D.C., U.S.A. (USNM) and the Tyrrell Museum of Paleontology, Drumheller, Alberta, Canada (TMP).

## Specimens examined

- Picea banksii* Hills & Ogilvie: TMP: 84-57-2-84-57-17.
- Picea harrimanii* Knowlton: USNM: 30070, 30071, 30096, 30097.
- Pinus* sp.: USNM: 30073, 30074.
- Picea* sp.: USNM: 30075, 30079A, 30079B.
- Picea?* sp.: USNM: 30090.
- Piceites cretaceus* Brown: USNM: 39280, 222835, 222836.
